# Supplementary material for: Simultaneous measurement of neodymium stable and radiogenic isotopes from a single aliquot using a double spike
Source: Royal Society of Chemistry journal article supplement (doi:10.1039/c9ja00308h), 2019-12-18
Supplement: c9ja00308h1.xlsx [file c9ja00308h1.xlsx]

## Sheet: Table A1
Electronic Appendix Table 1: Thermal ionisation mass spectrometer Nd isotope data for the JNdi-1 standard
Sample	Load Size (ng)	Barrel	Date	146Nd (V)	147Sm (V)	δ145Nd	95 % ci	δ146Nd	95 % ci	δ150Nd	95 % ci	143Nd/144Nd	95 % ci	δ148Nd	95 % ci	n	f 144Nd spike	β natural	95 % ci	β mass spec	95 % ci
Durham Period #1
JNdi-01	200	120	2016-11-26	2.52208	8.78057e-05	-0.00113231	0.0026718	-0.00225463	0.00533841	-0.00667435	0.0160198	0.512095	3.1626e-06	0.00783162	0.0106788	314	0.0408095	-0.000163112	0.000384879	0.0603323	0.0120145
JNdi-03	200	120	2016-11-28	2.02289	5.45669e-05	0.00438228	0.00288825	0.00872595	0.00577089	0.0258316	0.0173176	0.512093	3.51181e-06	0.0276605	0.0115439	320	0.0408096	0.000631277	0.000416057	-0.0276302	0.0131549
JNdi-04	200	120	2016-11-26	2.04205	8.9255e-05	-0.00249659	0.00387461	-0.00497117	0.00774171	-0.014716	0.0232318	0.51211	5.13594e-06	0.00990419	0.0154863	294	0.0408099	-0.00035964	0.000558149	0.230351	0.00701795
JNdi-06	200	121	2016-12-01	2.80946	0.00010039	-0.00363209	0.00267678	-0.00723215	0.00534837	-0.0214091	0.0160497	0.512096	3.08445e-06	0.0149459	0.0106987	301	0.0408094	-0.000523212	0.000385598	0.171334	0.0101144
JNdi-08	200	122	2016-12-04	2.8833	8.85493e-05	0.00406962	0.00251538	0.0081034	0.00502589	0.0239886	0.015082	0.512107	2.88788e-06	0.0117771	0.0100537	320	0.0408096	0.000586238	0.000362346	0.0166645	0.0200862
JNdi-09	200	123	2016-12-07	2.84051	6.40734e-05	0.00210356	0.00251495	0.00418858	0.00502502	0.0123995	0.0150794	0.512094	2.98661e-06	0.0151708	0.0100519	316	0.0408094	0.000303022	0.000362284	-0.13525	0.00920402
JNdi-10	200	124	2016-12-08	2.89101	6.39462e-05	0.00353464	0.00290007	0.00703813	0.00579452	0.0208351	0.0173885	0.512104	3.04655e-06	0.0154105	0.0115912	320	0.0368518	0.000509172	0.000417761	-0.0570696	0.0132897
JNdi-14	200	125	2016-12-12	2.36347	5.68181e-05	0.00647191	0.00304603	0.0128868	0.00608615	0.0381492	0.0182637	0.512097	3.2089e-06	0.0208317	0.0121746	313	0.036852	0.000932291	0.000438785	-0.018178	0.00860009
JNdi-15	200	132	2017-01-23	2.51753	9.0266e-05	-0.00112418	0.00356454	-0.00223846	0.00712216	-0.00662647	0.0213726	0.512102	3.48519e-06	-0.0348716	0.014247	314	0.0368522	-0.000161942	0.000513481	0.147743	0.0315744
JNdi-17	200	132	2017-01-23	1.78482	4.13783e-05	0.00099263	0.00543786	0.00197651	0.0108652	0.00585107	0.0326048	0.512099	4.28588e-06	-0.00395992	0.0217344	305	0.0368517	0.000142991	0.000783337	-0.0886534	0.0142878
JNdi-18	200	132	2017-01-23	1.59833	3.57872e-05	-0.00422185	0.00556573	-0.00840647	0.0111207	-0.0248854	0.0333715	0.512099	4.25343e-06	-0.0214748	0.0222455	301	0.0368519	-0.000608169	0.000801761	-0.102591	0.0133223
JNdi-19	200	132	2017-01-23	1.44116	3.40092e-05	0.00100663	0.0037192	0.00200439	0.00743119	0.00593359	0.0222999	0.512105	4.54007e-06	-0.0162725	0.0148652	307	0.0368518	0.000145007	0.00053576	-0.10787	0.012531
JNdi-20	200	132	2017-01-24	0.931773	2.05248e-05	-0.00291147	0.00500586	-0.00579726	0.010002	-0.0171615	0.0300146	0.512101	5.97535e-06	-0.0155956	0.0200078	301	0.0368525	-0.000419405	0.000721109	-0.0702833	0.00756807
JNdi-21	200	132	2017-01-24	1.96492	6.40921e-05	-0.0021677	0.00339795	-0.00431629	0.00678932	-0.0127774	0.0203738	0.5121	3.78951e-06	-0.0102059	0.0135812	300	0.0368507	-0.000312263	0.000489485	0.0458102	0.025118
JNdi-22	200	132	2017-01-24	1.51899	4.78923e-05	0.0021355	0.00450776	0.00425219	0.00900677	0.0125878	0.027028	0.512099	5.17459e-06	-0.00400077	0.0180169	243	0.0368527	0.000307624	0.000649352	0.0626395	0.0269207
JNdi-26	200	133	2017-01-27	4.91842	0.000160311	0.00635794	0.00171812	0.0126599	0.0034329	0.0374774	0.0103016	0.512104	1.83904e-06	0.0246147	0.00686708	390	0.0368523	0.000915875	0.000247497	0.157682	0.014169
JNdi-27	200	133	2017-01-29	2.24028	5.99219e-05	0.00117673	0.00260036	0.00234309	0.00519568	0.00693625	0.0155915	0.512098	2.87964e-06	0.0243413	0.0103933	391	0.0368522	0.000169511	0.000374588	0.00875134	0.00793717
JNdi-28	200	133	2017-01-30	2.43179	8.78931e-05	-0.00523799	0.00273391	-0.0104298	0.00546253	-0.0308749	0.0163923	0.512098	3.03373e-06	-0.00621337	0.0109271	377	0.0368514	-0.000754547	0.000393829	0.184037	0.00746005
JNdi-30	200	134	2017-02-03	2.98009	8.7687e-05	0.000103655	0.00234356	0.000206397	0.00468258	0.000610996	0.0140517	0.512101	2.60214e-06	0.00407971	0.0093669	400	0.0368521	1.49318e-05	0.000337596	0.0314367	0.014435
JNdi-31	200	134	2017-02-04	6.66973	0.000185368	0.00527619	0.0014539	0.0105059	0.00290497	0.0311008	0.0087174	0.512098	1.69249e-06	0.00739243	0.00581103	391	0.036852	0.000760046	0.000209436	0.0869638	0.0101303
JNdi-32	200	134	2017-02-06	6.66973	0.000195699	0.00536125	0.00153644	0.0106753	0.00306991	0.0316023	0.00921235	0.512097	1.70579e-06	0.00248876	0.00614096	391	0.036852	0.0007723	0.000221327	0.0869288	0.0102516
JNdi-33	100	134	2017-02-03	2.07608	7.59972e-05	-0.000342501	0.00276837	-0.000681983	0.00553138	-0.00201887	0.0165989	0.512099	3.13885e-06	-0.0215283	0.0110648	400	0.0368512	-4.93381e-05	0.000398791	0.108035	0.0183225
JNdi-34	100	134	2017-02-04	2.21249	6.76449e-05	0.00557608	0.00269213	0.011103	0.00537904	0.0328686	0.0161417	0.512106	2.92198e-06	0.0338258	0.0107601	389	0.0368518	0.000803246	0.000387806	0.172367	0.0152503
JNdi-35	200	135	2017-02-09	6.66973	0.000194563	0.00532704	0.00149296	0.0106072	0.00298302	0.0314006	0.00895162	0.512097	1.70919e-06	0.00357463	0.00596716	391	0.036852	0.000767372	0.000215063	0.086915	0.0103891
JNdi-36	200	135	2017-02-12	2.6379	7.54038e-05	0.00147726	0.00250376	0.0029415	0.00500267	0.00870772	0.0150123	0.512097	2.97574e-06	0.000280513	0.0100072	394	0.0368518	0.000212803	0.000360672	0.00996859	0.0112383
JNdi-38	100	135	2017-02-13	1.81395	4.61892e-05	-0.00277739	0.00278904	-0.00553029	0.00557267	-0.0163712	0.0167228	0.5121	3.37769e-06	0.0248999	0.0111474	400	0.0368511	-0.00040009	0.000401769	0.0459268	0.0156469
JNdi-39	200	136	2017-02-15	3.57524	9.48831e-05	0.00227582	0.00460642	0.00453159	0.00920391	0.0134149	0.0276196	0.512096	2.41075e-06	0.0230554	0.0184113	400	0.0368516	0.000327838	0.000663565	-0.00689206	0.0123812
JNdi-40	200	136	2017-02-15	3.36802	0.000108484	0.00355969	0.00203345	0.00708802	0.00406295	0.0209828	0.0121923	0.512101	2.35575e-06	0.0245018	0.00812742	384	0.0368518	0.000512782	0.000292922	0.153838	0.0110566
JNdi-41	200	136	2017-02-16	3.93005	0.000118862	-0.00166871	0.00201789	-0.00332271	0.00403188	-0.00983615	0.0120991	0.512103	2.21567e-06	0.00974797	0.00806525	386	0.0368514	-0.000240382	0.000290683	0.082129	0.0110245
JNdi-42	100	137	2017-02-19	3.27565	0.000109588	0.00470856	0.00204886	0.00937564	0.00409375	0.0277549	0.0122847	0.512103	2.52563e-06	-0.00476872	0.00818902	391	0.0368508	0.000678278	0.000295142	0.159444	0.00991797
JNdi-43	100	137	2017-02-20	2.63872	6.91592e-05	0.0065527	0.00235687	0.0130477	0.00470917	0.0386255	0.0141316	0.512101	2.67483e-06	-0.00495801	0.0094201	400	0.0368518	0.00094393	0.000339511	0.00239206	0.0130085
JNdi-47	100	138	2017-02-24	2.39782	6.10953e-05	0.00632635	0.00253922	0.012597	0.00507353	0.0372912	0.0152249	0.512097	2.74631e-06	-0.0151064	0.0101489	400	0.0368512	0.000911323	0.000365779	-0.0447297	0.00946349
JNdi-48	100	139	2017-02-25	2.44639	6.14819e-05	0.00471926	0.00260032	0.00939695	0.0051956	0.027818	0.0155912	0.512099	3.00359e-06	0.00903574	0.0103931	389	0.0368513	0.00067982	0.000374581	-0.0760043	0.0096215
JNdi-49	100	139	2017-02-27	3.21073	7.84044e-05	0.0105417	0.00219961	0.0209907	0.00439496	0.0621398	0.0131887	0.512105	2.55377e-06	0.0116825	0.00879157	400	0.0368515	0.00151856	0.000316857	-0.0494557	0.0117646
JNdi_50	100	139	2017-02-28	2.93896	8.08208e-05	0.0015246	0.00243255	0.00303577	0.00486038	0.0089868	0.0145853	0.512102	2.68682e-06	-0.00572295	0.00972258	392	0.0368508	0.000219623	0.000350414	0.0605225	0.00967106
JNdi-53	100	140	2017-03-03	3.20694	8.75611e-05	-0.00121214	0.00222496	-0.0024136	0.00444561	-0.00714495	0.0133406	0.512097	2.56875e-06	-0.00773867	0.00889287	400	0.0368514	-0.000174613	0.000320511	-0.0257958	0.0137614
JNdi-54	100	140	2017-03-03	2.55856	9.92529e-05	-0.00268642	0.00519507	-0.00534915	0.0103801	-0.0158349	0.0311491	0.512102	3.20909e-06	-0.0197728	0.020764	362	0.036851	-0.000386985	0.000748365	0.169609	0.0139287
JNdi-101	100	150	2017-04-27	2.49045	8.42759e-05	0.00414176	0.00271854	0.00824703	0.0054318	0.0244138	0.0163	0.5121	3.08904e-06	0.0285582	0.0108656	387	0.0371579	0.000596629	0.00039161	0.0977469	0.0185675
JNdi-102	100	150	2017-04-27	2.22016	8.75094e-05	-0.00400445	0.00480766	-0.00797359	0.00960599	-0.023604	0.0288262	0.512103	3.05354e-06	-0.00539947	0.0192156	400	0.0371574	-0.000576852	0.000692558	0.204959	0.0168004
JNdi-103	100	150	2017-04-28	1.58119	5.58782e-05	0.00212431	0.00368325	0.00422989	0.00735936	0.0125218	0.0220844	0.512101	4.09616e-06	-0.00173987	0.0147215	352	0.0371585	0.000306011	0.00053058	0.204896	0.00736177
JNdi-104	100	150	2017-05-02	2.17527	7.79412e-05	0.00587956	0.00291487	0.0117073	0.00582408	0.0346575	0.0174772	0.512106	3.27948e-06	-0.012055	0.0116503	384	0.0371582	0.000846963	0.000419892	0.165025	0.0132196
JNdi-105	100	150	2017-04-28	1.49899	5.65786e-05	-0.00453196	0.00427078	-0.00902397	0.00853328	-0.0267133	0.0256072	0.512096	4.92587e-06	-0.0467526	0.0170697	242	0.0371579	-0.000652842	0.00061522	0.25303	0.0123234
JNdi-106	100	150	2017-05-02	1.72849	6.32865e-05	0.0055804	0.00317501	0.0111117	0.00634386	0.0328941	0.019037	0.512106	3.74488e-06	-0.0168597	0.0126901	400	0.0371581	0.000803869	0.000457365	0.080602	0.0227021
JNdi-107	100	160	2017-07-28	1.85898	6.82976e-05	0.0032863	0.00299646	0.00654365	0.00598712	0.0193712	0.0179665	0.512102	3.39311e-06	0.000115482	0.0119765	380	0.0371574	0.000473399	0.000431647	0.171845	0.011412
JNdi-108	100	160	2017-07-31	2.32291	8.08305e-05	0.00302225	0.0026915	0.00601786	0.00537778	0.0178147	0.0161379	0.512104	2.94383e-06	-0.0141355	0.0107576	400	0.0371576	0.000435361	0.000387716	0.109075	0.0165924
JNdi-113	100	162	2017-09-11	1.11028	4.84155e-05	-0.00107591	0.0037494	-0.00214234	0.00749153	-0.00634193	0.022481	0.512106	4.45347e-06	-0.0534385	0.0149858	391	0.0371578	-0.000154988	0.000540111	0.131508	0.016014
JNdi-114	100	162	2017-09-12	1.18119	4.40471e-05	0.00451021	0.00349583	0.0089807	0.00698487	0.0265857	0.0209606	0.512118	4.0934e-06	-0.0396701	0.0139723	399	0.0371565	0.000649706	0.00050358	0.0378377	0.0145034
JNdi-116	100	163	2017-09-14	1.1298	4.77366e-05	-0.00140675	0.00397947	-0.00280111	0.00795123	-0.00829207	0.0238605	0.512107	4.4638e-06	-0.0535217	0.0159054	366	0.0371571	-0.000202647	0.000573254	0.157637	0.0175696
JNdi-117	100	163	2017-09-21	0.6054	2.21719e-05	0.00673769	0.00480684	0.013416	0.00960436	0.0397159	0.0288213	0.512101	5.44451e-06	-0.0328666	0.0192123	479	0.037157	0.000970578	0.000692433	0.12273	0.0173166
JNdi-118	100	163	2017-09-22	0.876942	3.68619e-05	0.000609363	0.00373064	0.00121336	0.00745405	0.00359189	0.0223685	0.512113	4.44137e-06	-0.0137223	0.0149109	576	0.0371571	8.77803e-05	0.000537408	0.197075	0.0133373
JNdi 119	100	164	2017-09-25	0.883591	2.82892e-05	-0.00184322	0.00411532	-0.0036702	0.00822265	-0.0108648	0.024675	0.512099	4.66831e-06	0.0120756	0.0164484	389	0.0371579	-0.000265521	0.000592823	0.175423	0.0150742
JNdi 120	100	164	2017-09-26	1.14996	3.8478e-05	0.00212569	0.00383817	0.00423266	0.00766889	0.0125299	0.0230132	0.512119	4.53518e-06	-0.00264253	0.0153406	400	0.037157	0.000306211	0.000552896	0.0933832	0.0156423
JNdi-128	200	166	2017-10-23	2.1445	5.34147e-05	-0.00122393	0.00261236	-0.00243708	0.00521965	-0.00721444	0.0156634	0.512099	3.13642e-06	0.0249332	0.0104413	399	0.0371576	-0.000176311	0.000376317	-0.0425219	0.0112119
JNdi-129	200	166	2017-10-24	2.75322	9.24199e-05	0.005854	0.0021732	0.0116564	0.00434218	0.0345069	0.0130303	0.512113	2.52014e-06	0.00787282	0.00868598	398	0.0371581	0.000843281	0.000313053	0.0909043	0.0139726
JNdi-130	200	166	2017-11-25	2.21859	8.03655e-05	0.00848211	0.00274813	0.0168895	0.00549093	0.0499988	0.0164775	0.512106	2.91659e-06	-0.000937406	0.0109839	386	0.0371568	0.00122186	0.000395871	0.127397	0.0114244
JNdi-131	200	167	2017-11-01	1.22609	5.20777e-05	-0.00304043	0.0067032	-0.00605406	0.0133934	-0.0179217	0.0401917	0.512092	8.77678e-06	-0.0361295	0.0267918	112	0.0371578	-0.000437982	0.000965616	0.267221	0.0106578
JNdi-132	200	167	2017-11-02	2.707	9.66512e-05	0.00519823	0.00228271	0.0103507	0.00456099	0.0306413	0.0136869	0.512108	2.58929e-06	0.00167157	0.00912368	388	0.0371582	0.000748816	0.000328828	0.0695949	0.00945066
JNdi-133	200	167	2017-11-03	2.98061	0.000115589	0.000109814	0.00241359	0.000218659	0.0048225	0.000647295	0.0144716	0.512105	2.82426e-06	0.014812	0.00964679	400	0.0371574	1.58189e-05	0.000347683	0.177642	0.0122605
JNdi-134	100	168	2017-11-08	0.864059	2.87218e-05	0.0047151	0.00458447	0.00938867	0.00916004	0.0277935	0.027488	0.512106	5.48054e-06	-0.00202413	0.0183235	399	0.0371581	0.000679221	0.000660401	0.0986746	0.0147732
JNdi-136	100	168	2017-11-10	0.901092	3.02067e-05	0.00537831	0.00436964	0.0107093	0.00873081	0.0317028	0.0261999	0.512112	4.74284e-06	0.0314723	0.0174649	377	0.0371596	0.000774757	0.000629454	0.130252	0.0118589
JNdi-138	100	169	2017-11-14	2.27111	7.44642e-05	-0.00145365	0.00251822	-0.00289449	0.00503155	-0.0085685	0.015099	0.512101	2.88161e-06	-0.0197331	0.010065	399	0.0371573	-0.000209402	0.000362756	0.0887432	0.0119615
JNdi-139	100	169	2017-11-15	1.80614	5.47926e-05	0.00290109	0.00340782	0.00577661	0.00680904	0.0171005	0.020433	0.51211	3.84868e-06	-0.00148236	0.0136206	400	0.0371583	0.000417908	0.000490904	0.0838459	0.015968
JNdi-140	100	169	2017-11-16	1.3184	4.25365e-05	-0.000172435	0.00416901	-0.000343351	0.00832994	-0.00101642	0.0249969	0.51211	4.74879e-06	0.00140582	0.016663	542	0.0371566	-2.48398e-05	0.000600556	0.139151	0.0149935
JNdi-141	100	170	2017-11-29	1.20836	4.01479e-05	0.0016461	0.00293145	0.0032777	0.00585722	0.00970297	0.0175767	0.512095	3.41493e-06	0.0245722	0.0117166	528	0.0371585	0.000237125	0.000422283	0.153779	0.0117596
Average								0.00365571	0.00180898			0.512102	1.12609e-05
									95% se				2SD
Durham Period #2
JNdi-147	200	172	2018-01-08	2.12559	5.70717e-05	0.00454755	0.00263367	0.00905503	0.00526224	0.0268058	0.0157912	0.512117	3.06054e-06	0.00159587	0.0105264	389	0.037158	0.000655084	0.000379385	0.0478743	0.0103886
JNdi-148	200	172	2018-01-09	3.13577	8.43857e-05	0.00567528	0.00233651	0.0113006	0.00466849	0.0334534	0.0140095	0.512114	2.56731e-06	-0.0031688	0.00933871	394	0.0371577	0.000817536	0.000336578	0.0819292	0.0115654
JNdi-149	200	172	2018-01-10	3.30683	0.000111933	0.00729988	0.00216076	0.0145355	0.00431733	0.0430299	0.0129557	0.512114	2.36032e-06	-0.00823771	0.00863627	379	0.0371581	0.00105156	0.000311261	0.156706	0.0106828
JNdi-150	200	173	2018-01-11	3.94899	0.00010933	0.011746	0.00213495	0.0233887	0.00426577	0.0692388	0.012801	0.512114	2.24305e-06	0.00860636	0.00853312	351	0.0371577	0.00169203	0.000307542	0.0622974	0.00766186
JNdi-151	200	173	2018-01-12	2.64081	6.91432e-05	0.0119743	0.00234584	0.0238432	0.00468714	0.0705844	0.0140654	0.512121	2.66269e-06	0.0191439	0.00937602	393	0.0371578	0.00172492	0.00033792	0.0213658	0.0116541
JNdi-152	200	173	2018-01-15	2.42747	7.75603e-05	0.0116789	0.00249484	0.023255	0.00498483	0.068843	0.0149588	0.512122	2.72626e-06	-0.0112527	0.00997152	382	0.0371574	0.00168236	0.000359383	0.0852388	0.0110293
JNdi-158	100	175	2018-01-29	0.798698	2.82698e-05	0.0105715	0.00366101	0.0210498	0.00731491	0.0623149	0.021951	0.512119	4.12768e-06	-0.0130564	0.0146326	584	0.037159	0.00152284	0.000527371	0.0300373	0.00942301
JNdi-159	100	175	2018-01-30	1.11543	4.03024e-05	0.00447354	0.00325494	0.00890767	0.00650357	0.0263695	0.0195163	0.512108	4.041e-06	0.00968255	0.0130096	500	0.037158	0.000644423	0.00046888	0.0531763	0.0159451
JNdi-165	100	177	2018-02-09	1.18148	2.5936e-05	0.017824	0.00318057	0.0354912	0.00635498	0.105068	0.0190704	0.512119	3.6567e-06	0.0473917	0.0127123	521	0.0371578	0.00256756	0.000458161	0.0152118	0.0130063
JNdi-166	100	177	2018-02-10	1.47622	3.72826e-05	0.0127722	0.00293848	0.025432	0.00587127	0.0752879	0.0176188	0.512113	3.30818e-06	0.0262289	0.0117447	440	0.0371575	0.00183985	0.00042329	0.0635203	0.0116259
JNdi-167	100	178	2018-02-14	1.29261	3.54549e-05	0.0014727	0.00315819	0.00293243	0.00631025	0.00868086	0.0189361	0.512103	3.8513e-06	-0.0213473	0.0126228	400	0.0371573	0.000212146	0.000454944	0.0245088	0.0110985
JNdi-168	100	178	2018-02-15	1.6972	5.50288e-05	0.0139275	0.00287597	0.0277325	0.00574637	0.0820986	0.017244	0.512114	3.44393e-06	0.0131954	0.0114949	405	0.0371574	0.00200628	0.000414285	0.0852238	0.010964
JNdi-169	100	179	2018-02-20	1.16818	1.50644e-05	0.017733	0.00366426	0.0353101	0.00732141	0.104532	0.0219705	0.512109	4.26676e-06	0.0620723	0.0146455	400	0.0371571	0.00255446	0.000527836	-0.0712474	0.0110362
JNdi-170	100	179	2018-02-21	1.72144	3.66324e-05	0.0150618	0.00303365	0.029991	0.00606143	0.0887846	0.0181895	0.512127	3.81081e-06	0.0334194	0.0121251	400	0.0371582	0.00216967	0.000436999	-0.0606105	0.00920545
JNdi-171	100	179	2018-02-22	1.79513	4.99463e-05	0.00686807	0.00287804	0.0136757	0.00575049	0.0404845	0.0172564	0.512115	3.31602e-06	0.0301657	0.0115031	398	0.0371587	0.000989359	0.000414586	0.0437171	0.0124032
JNdi-173	150	180	2018-02-28	2.62901	8.221e-05	0.00477523	0.00230496	0.0095084	0.00460545	0.0281479	0.0138203	0.512112	2.57136e-06	-0.0255025	0.00921261	400	0.0371577	0.000687882	0.000332033	0.0464017	0.0151296
JNdi-174	150	180	2018-03-01	2.68604	7.86985e-05	0.0103035	0.00248996	0.0205162	0.00497509	0.0607352	0.0149295	0.51212	2.7366e-06	-0.0056815	0.00995203	400	0.0371575	0.00148423	0.000358681	0.0454278	0.0157353
JNdi-175	150	182	2018-03-07	1.82134	6.49283e-05	0.0115467	0.00371321	0.0229918	0.00741922	0.0680638	0.022264	0.512129	4.37382e-06	-0.0291377	0.0148412	400	0.0371581	0.00166332	0.000534891	0.137706	0.00890328
JNdi-176	100	184	2018-03-14	0.859882	2.73182e-05	0.0159368	0.00525623	0.0317334	0.0105023	0.093943	0.0315158	0.512118	6.44668e-06	-0.000871334	0.0210084	285	0.0371574	0.00229572	0.000757161	0.223026	0.00811743
JNdi-177	200	184	2018-03-13	2.66712	6.28766e-05	0.00669908	0.00251589	0.0133392	0.0050269	0.0394883	0.015085	0.512116	2.6754e-06	0.00202885	0.0100557	400	0.0371576	0.000965016	0.000362418	-0.0184963	0.0117852
JNdi-179	100	187	2018-03-23	3.66389	0.000142086	0.00963912	0.00271774	0.0191934	0.0054302	0.0568191	0.0162953	0.512128	3.13213e-06	-0.00898005	0.0108624	355	0.0371576	0.00138853	0.000391493	0.21855	0.0133939
JNdi-180	100	187	2018-03-28	1.91726	3.751e-05	0.0160971	0.00258945	0.0320526	0.00517388	0.0948879	0.0155261	0.512124	3.02402e-06	0.0277678	0.0103497	396	0.0371576	0.00231881	0.000373011	-0.0433746	0.00831635
JNdi-181	100	187	2018-03-29	1.53925	4.06766e-05	0.00361975	0.00341956	0.0072076	0.00683249	0.0213368	0.0205033	0.512113	3.54511e-06	0.0125434	0.0136675	385	0.0371571	0.000521433	0.000492594	0.139437	0.0140316
JNdi-182	150	188	2018-03-30	1.92124	6.01163e-05	0.012214	0.0025146	0.0243205	0.00502432	0.0719975	0.0150773	0.512119	3.01768e-06	0.00686538	0.0100505	399	0.0371577	0.00175945	0.00036223	0.0295089	0.0117732
JNdi-183	150	188	2018-03-31	2.31284	7.70381e-05	0.00872579	0.0042406	0.0173748	0.00847297	0.0514352	0.0254262	0.512133	5.18022e-06	0.0151237	0.0169491	189	0.037158	0.00125697	0.000610863	0.171103	0.0133708
JNdi-184	150	188	2018-04-01	1.99872	5.92971e-05	0.00909206	0.00263257	0.0181041	0.00526004	0.0535943	0.0157846	0.512122	3.11768e-06	0.0172702	0.010522	399	0.037158	0.00130973	0.000379225	0.0189783	0.0127549
JNdi-185	150	189	2018-04-05	1.6359	4.87996e-05	0.0119043	0.00304552	0.0237038	0.00608514	0.0701718	0.0182606	0.512121	3.59668e-06	0.00638052	0.0121725	400	0.0371576	0.00171483	0.00043871	-0.0387934	0.0109497
JNdi-186	150	189	2018-04-06	1.62533	3.7167e-05	0.00790256	0.0028742	0.0157355	0.00574282	0.0465825	0.0172334	0.512118	3.53974e-06	-0.00331525	0.0114878	384	0.0371576	0.00113838	0.000414032	0.0385392	0.010791
JNdi-187	150	189	2018-04-07	2.48467	7.22033e-05	0.0123667	0.00253007	0.0246246	0.00505523	0.0728976	0.01517	0.512119	2.79682e-06	0.00596264	0.0101123	400	0.0371577	0.00178144	0.000364458	0.0148613	0.0116142
JNdi-188	100	190	2018-04-09	1.55118	5.26407e-05	0.00134488	0.00461587	0.00267791	0.00922279	0.00792742	0.0276763	0.512119	4.90975e-06	-0.00266166	0.018449	200	0.0371571	0.000193733	0.000664927	0.176363	0.00842394
JNdi-190	100	190	2018-04-10	0.99603	3.36548e-05	0.00358543	0.00390865	0.00713928	0.00780972	0.0211345	0.0234358	0.512117	4.63015e-06	-0.00349798	0.0156223	400	0.0371575	0.00051649	0.000563049	0.099321	0.0177558
JNdi-191	100	190	2018-04-11	1.49347	4.14276e-05	0.0106731	0.00316988	0.0212522	0.0063336	0.062914	0.0190062	0.512118	3.59709e-06	0.0083414	0.0126696	397	0.0371576	0.00153747	0.000456624	0.0597825	0.0157353
JNdi-192	100	190	2018-04-11	1.41511	4.31524e-05	0.0107531	0.00333159	0.0214116	0.00665671	0.063386	0.0199758	0.51212	4.10367e-06	0.0146439	0.0133159	400	0.0371564	0.00154901	0.000479918	0.0372308	0.0138098
JNdi-193	100	192	2018-06-27	1.79979	3.14531e-05	0.00770041	0.00292469	0.015333	0.0058437	0.0453909	0.0175361	0.512097	3.29516e-06	0.0206618	0.0116896	397	0.0371577	0.00110926	0.000421305	-0.0881008	0.0108271
JNdi-195	100	192	2018-06-29	2.74807	0.000106988	0.00104801	0.00227998	0.00208678	0.00455555	0.0061775	0.0136705	0.512115	2.83604e-06	-0.00398108	0.00911279	399	0.0371571	0.000150968	0.000328437	0.217609	0.00911156
JNdi-196	100	192	2018-07-02	2.62557	7.19e-05	0.0158677	0.00360553	0.0315957	0.00720408	0.0935355	0.0216184	0.51212	4.17584e-06	0.0136221	0.0144108	189	0.0371578	0.00228576	0.000519378	0.0588983	0.0106991
Average								0.0191056	0.00312824			0.512117	1.36324e-05
									95% se				2SD
Monash
JNdi-001	150	M006	2018-09-19	1.78959	8.24415e-05	-0.012826	0.00316321	-0.0255388	0.00632028	-0.0756005	0.0189663	0.5121	3.77665e-06	-0.0453309	0.0126429	369	0.0397828	-0.00184763	0.000455674	0.150888	0.00254124
JNdi-002	150	M006	2018-09-19	2.29804	8.22997e-05	-0.0116071	0.00268549	-0.0231118	0.00536578	-0.068416	0.0161019	0.512105	3.23578e-06	-0.0259957	0.0107336	386	0.0397808	-0.00167204	0.000386857	0.140272	0.00321282
JNdi-003	150	M006	2018-09-20	1.23996	7.77901e-05	-0.0101304	0.00453918	-0.0201714	0.00906956	-0.0597122	0.0272164	0.512096	5.13398e-06	-0.0796213	0.0181425	252	0.0397805	-0.00145932	0.000653887	0.204357	0.00543928
JNdi-004	150	M006	2018-09-20	1.43931	6.3471e-05	-0.010335	0.00320714	-0.0205788	0.00640805	-0.060918	0.0192296	0.512098	3.82154e-06	-0.0502538	0.0128185	377	0.0397833	-0.00148879	0.000462001	0.198784	0.00507431
JNdi-005	150	M009	2018-12-13	2.34271	9.30136e-05	-0.013731	0.00363913	-0.0273408	0.0072712	-0.0809344	0.0218198	0.512101	2.90523e-06	-0.0566971	0.0145451	400	0.0397827	-0.001978	0.000524233	0.0989134	0.0102502
JNdi-006	150	M009	2018-12-14	2.53597	8.81042e-05	-0.00900274	0.00242923	-0.0179261	0.00485376	-0.0530654	0.0145654	0.512105	2.89832e-06	-0.0558962	0.00970932	386	0.0397827	-0.00129687	0.00034994	0.0985998	0.00840084
JNdi-007	150	M010	2019-04-08	1.81486	6.63703e-05	-0.00800426	0.00309438	-0.0159379	0.00618276	-0.0471801	0.0185536	0.512102	3.43467e-06	-0.0480818	0.0123678	374	0.0397829	-0.00115304	0.000445756	0.151365	0.00566069
JNdi-008	150	M010	2019-04-09	1.86041	5.73216e-05	-0.0131914	0.00290008	-0.0262663	0.00579453	-0.077754	0.0173886	0.512099	3.27639e-06	-0.0561901	0.0115912	387	0.039783	-0.00190026	0.000417769	0.0845643	0.01009
JNdi-009	150	M012	2019-05-09	1.65187	6.08316e-05	-0.0152238	0.00338019	-0.0303132	0.00675383	-0.0897332	0.0202673	0.512101	3.71255e-06	-0.0667025	0.0135102	372	0.0397828	-0.00219304	0.000486933	0.136392	0.00583812
JNdi-011	150	M013	2019-05-13	2.46859	0.000111379	-0.00738351	0.00236434	-0.0147019	0.00472409	-0.0435212	0.0141763	0.512103	2.80226e-06	-0.0653503	0.00944993	400	0.039783	-0.00106362	0.000340591	0.163496	0.00480047
JNdi-012	150	M015	2019-05-21	2.17901	8.97797e-05	-0.0124477	0.00318242	-0.0247855	0.00635867	-0.0733706	0.0190815	0.512094	4.39582e-06	-0.0553025	0.0127197	360	0.0397827	-0.00179313	0.000458442	0.148538	0.00809415
JNdi-013	150	M015	2019-05-23	1.59302	7.53536e-05	-0.0115487	0.00347808	-0.0229954	0.00694941	-0.0680716	0.0208542	0.512111	3.9194e-06	-0.059788	0.0139014	374	0.0397833	-0.00166362	0.000501031	0.219258	0.0101106
JNdi-014	150	M016	2019-05-27	1.96981	7.53008e-05	-0.0115097	0.00342967	-0.0229178	0.00685269	-0.0678418	0.0205639	0.512104	3.70368e-06	-0.0420881	0.0137079	353	0.0397828	-0.00165801	0.000494058	0.205141	0.0102047
JNdi-016	150	M017	2019-05-31	2.21391	6.98799e-05	-0.012078	0.00268943	-0.0240495	0.00537365	-0.0711917	0.0161256	0.512106	3.30715e-06	-0.0250761	0.0107493	381	0.0397835	-0.00173988	0.000387424	0.064749	0.01035
JNdi-017	150	M017	2019-06-01	2.63581	9.61484e-05	-0.0146366	0.00263847	-0.029144	0.00527183	-0.0862722	0.01582	0.512099	2.96333e-06	-0.0345163	0.0105456	373	0.0397827	-0.00210845	0.000380084	0.109858	0.00903924
JNdi-018	150	M018	2019-07-03	2.17656	8.25162e-05	-0.0121839	0.00265821	-0.0242603	0.00531126	-0.0718159	0.0159383	0.512103	3.08165e-06	-0.0717646	0.0106245	372	0.0397829	-0.00175514	0.000382926	0.108713	0.0085773
Average								-0.0231275	0.00234768			0.512102	8.31837e-06
									95% se				2SD
Monash (Rotating Amplifiers)
JNdiDS-022(RTA)	300	M018	2019-07-03	4.12364	0.000171239	-0.0119613	0.00173762	-0.023817	0.00347187	-0.0705035	0.0104186	0.512099	1.91299e-06	-0.0568464	0.00694503	624	0.0397832	-0.00172306	0.000250311	0.150854	0.0116459
JNdiDS-024(RTA)	300	M018	2019-07-03	2.7802	0.000102524	-0.0114168	0.0020696	-0.0227329	0.00413518	-0.0672945	0.0124091	0.512102	2.41654e-06	-0.061329	0.0082719	586	0.0397833	-0.00164463	0.000298134	0.144212	0.00394151
JNdiDS-025(RTA)	300	M018	2019-07-03	2.86169	0.000113538	-0.0131717	0.0018898	-0.0262272	0.00377593	-0.0776382	0.011331	0.512099	2.20889e-06	-0.0628797	0.00755327	599	0.0397832	-0.00189743	0.000272234	0.185399	0.00712707
Average								-0.024259	0.00444313
Monash (Alternate Cup Configuration 145Ax)
JNdi-019(145Ax)	150	M018	2019-07-04	1.67538	7.53167e-05	-0.00554748	0.00335733	-0.011046	0.00670815	-0.0326991	0.0201302	0.512114	3.54202e-06	-0.115723	0.0134188	368	0.0397819	-0.00079913	0.000483635	0.214918	0.0018914
JNdi-020(145Ax)	150	M018	2019-07-04	2.85538	0.000100628	-0.00505217	0.00241684	-0.0100598	0.004829	-0.0297796	0.0144911	0.512111	2.75761e-06	-0.0767442	0.0096598	392	0.0397822	-0.00072778	0.000348154	0.152611	0.0137365
JNdi-021(145Ax)	150	M019	2019-07-09	1.84475	9.62369e-05	-0.00628911	0.00324979	-0.0125227	0.00649327	-0.0370705	0.0194854	0.512102	4.05262e-06	-0.0650937	0.012989	274	0.0397818	-0.000905964	0.000468143	0.239072	0.00372606
JNdi-022(145Ax)	300	M018	2019-07-04	1.63336	6.95729e-05	-0.00861419	0.00299166	-0.0171524	0.00597751	-0.0507752	0.0179377	0.512113	3.55974e-06	-0.109359	0.0119573	355	0.0397819	-0.0012409	0.00043096	0.240813	0.00071894
JNdi-023(145Ax)	300	M018	2019-07-05	1.99931	5.86205e-05	-0.0055464	0.00278343	-0.0110439	0.00556147	-0.0326928	0.0166892	0.512101	3.13928e-06	-0.0313938	0.011125	381	0.0397829	-0.000798975	0.000400962	0.0301371	0.00955156
JNdi-024(145Ax)	300	M018	2019-07-04	2.31041	8.93888e-05	-0.00592415	0.0026454	-0.0117961	0.00528566	-0.0349193	0.0158615	0.512112	3.06756e-06	-0.072389	0.0105733	385	0.0397821	-0.000853391	0.000381078	0.213455	0.00137313
Average								-0.0122702	0.00265541			0.512109	1.14987e-05
									95% se				2SD

## Sheet: Table A2
Electronic Appendix Table 2: Thermal ionisation mass spectrometer Nd isotope data for samples presented here
Sample	Locality	Mass (g)	Barrel	Date	146Nd (V)	147Sm (V)	δ145Nd	95 % ci	δ146Nd	95 % ci	δ150Nd	95 % ci	143Nd/144Nd	95 % ci	δ148Nd	95 % ci	n	f 144Nd spike	β natural	95 % ci	β mass spec	95 % ci	spikeprop	Nd (ppm)	Sm (ppm)	Sm/Nd		JNdi	δ146NdCOR	95 % ci	143Nd/144NdCOR
USGS Rock Standards
BHVO-2 (1)	Kilauea volcano, Hawaii	0.02098	180	2018-03-01	3.16391	1.41972e-05	-0.00784352	0.00222151	-0.0156178	0.00443872	-0.0462327	0.01332	0.512993	2.59016e-06	-0.0668856	0.00887909	375	0.0318478	-0.00112988	0.000320017	0.0674915	0.00996796	0.347849	24.167			D2	0.0191	-0.0347178	0.00541408	0.512988
BHVO-2 (1)*		0.02098	182	2018-03-07	1.59997	9.14571e-06	-0.00815784	0.00364755	-0.0162437	0.00728802	-0.0480854	0.0218703	0.512999	3.88596e-06	-0.0725082	0.0145788	321	0.0318474	-0.00117516	0.000525442	0.185208	0.00483495	0.347849	24.1673			D2	0.0191	-0.0353437	0.00791993	0.512994
BHVO-2 (2)	Kilauea volcano, Hawaii	0.0068	M009	2018-12-13	2.24033	4.93532e-06	-0.0242364	0.0026045	-0.0482587	0.00520394	-0.142853	0.0156163	0.512968	2.98116e-06	-0.104566	0.0104098	383	0.0396688	-0.00349136	0.000375193	0.103184	0.00922203	0.40112	24.8184			M	-0.023	-0.0252587	0.00600675	0.512978
BHVO-2 (2)#		0.0068	M009	2018-12-14	3.20667	7.77212e-06	-0.0279038	0.00204849	-0.0555609	0.004093	-0.164467	0.0122825	0.512971	2.3493e-06	-0.10561	0.00818752	398	0.0389805	-0.00401967	0.000295098	0.0111891	0.00714915	0.396751	24.7591			M	-0.023	-0.0325609	0.00507471	0.512981
BHVO-2 (2)$		0.00654023	M012	2019-05-09	2.21371	1.62017e-06	-0.0267334	0.00289491	-0.0532305	0.00578421	-0.157569	0.0173576	0.512969	3.34129e-06	-0.0694052	0.0115706	376	0.0409113	-0.00385106	0.00041703	0.0962943	0.0100206	0.408864	24.2178	6.02169	0.248647	M	-0.023	-0.0302305	0.00651591	0.512979
BHVO-2 (3)$	Kilauea volcano, Hawaii	0.0048134	M012	2019-05-10	2.36379	-7.44232e-07	-0.031056	0.00318727	-0.0618373	0.00636836	-0.183045	0.0191105	0.512969	3.99513e-06	-0.0969423	0.0127391	377	0.0474556	-0.00447376	0.000459149	0.0266086	0.00617047	0.446844	23.9323	6.0288	0.25191	M	-0.023	-0.0388373	0.0070396	0.512979
BHVO-2 (3)$		0.0062222	M010	2019-04-09	4.15053	1.54506e-05	-0.0280284	0.00188709	-0.055809	0.00377052	-0.165202	0.0113148	0.512966	2.12645e-06	-0.106703	0.00754245	395	0.0373649	-0.00403762	0.000271848	-0.0500763	0.00781973	0.386268	24.1275	6.05221	0.250843	M	-0.023	-0.032809	0.00481839	0.512976
BHVO-2 (4)	Kilauea volcano, Hawaii	0.0044	M009	2018-12-13	2.56293	1.59988e-05	-0.0228456	0.00253006	-0.0454894	0.00505522	-0.134656	0.01517	0.512974	3.97312e-06	-0.123946	0.0101123	378	0.0388942	-0.00329101	0.00036447	0.142376	0.0108339	0.396201	24.7462			M	-0.023	-0.0224894	0.00587837	0.512984
BHVO-2 (4)#		0.00435	M009	2018-12-14	3.20667	7.77212e-06	-0.0279038	0.00210078	-0.0555609	0.00419749	-0.164467	0.0125961	0.512971	2.36594e-06	-0.10561	0.00839655	398	0.0389805	-0.00401967	0.000302632	0.0111891	0.00682913	0.385107	24.6401			M	-0.023	-0.0325609	0.00515936	0.512981
BHVO-2 (4)$		0.00459638	M009	2018-12-13	1.27587	4.37375e-06	-0.0221464	0.00344212	-0.0440971	0.00687756	-0.130534	0.0206386	0.512975	4.19475e-06	-0.0970197	0.0137577	386	0.0388655	-0.00319027	0.000495857	0.209486	0.00770369	0.396016	24.0399	6.02077	0.250449	M	-0.023	-0.0210971	0.00750339	0.512985
BHVO-2 (4)$		0.00415013	M012	2019-05-09	2.252	-9.1508e-06	-0.02247	0.00303382	-0.0447415	0.00606176	-0.132442	0.0181905	0.512976	3.21303e-06	-0.0677504	0.0121258	380	0.0408551	-0.0032369	0.000437039	0.189078	0.012748	0.408519	24.0601	6.03034	0.250636	M	-0.023	-0.0217415	0.0067635	0.512986
BHVO-2 (5)	Kilauea volcano, Hawaii	0.005755	M010	2019-04-09	2.33435	2.9886e-06	-0.0277051	0.003789	-0.0551653	0.00757065	-0.163296	0.0227184	0.512971	3.05832e-06	-0.0847959	0.0151441	367	0.037928	-0.00399105	0.00054583	0.00370781	0.00527098	0.38996	25.0774			M	-0.023	-0.0321653	0.00814339	0.512981
BHVO-2 (5)#		0.005755	M010	2019-04-11	4.10895	7.49916e-06	-0.0280588	0.00191322	-0.0558695	0.00382273	-0.165381	0.0114715	0.512964	2.1939e-06	-0.100531	0.00764689	370	0.0371297	-0.004042	0.000275612	0.0287773	0.00563267	0.384713	25.1084			M	-0.023	-0.0328695	0.00485935	0.512974
BHVO-2 (5)$		0.00595642	M012	2019-05-10	3.12106	2.19459e-05	-0.0307263	0.00237978	-0.0611808	0.00475494	-0.181102	0.0142689	0.512968	2.58172e-06	-0.116037	0.00951165	369	0.0371864	-0.00442626	0.000342823	0.171395	0.0128958	0.38509	24.1201	6.03875	0.250362	M	-0.023	-0.0381808	0.00562223	0.512978
BHVO-2 (6)	Kilauea volcano, Hawaii	0.0057575	M010	2019-04-09	3.72501	1.80048e-05	-0.0299144	0.00222161	-0.0595642	0.00443892	-0.176317	0.0133206	0.512969	2.37408e-06	-0.101466	0.00887949	351	0.0381796	-0.00430931	0.000320039	-0.0270386	0.00318407	0.391594	24.8204			M	-0.023	-0.0365642	0.00535761	0.512979
BHVO-2 (6)#		0.00497	M010	2019-04-10	4.28891	-3.93565e-06	-0.0189848	0.00198401	-0.0378019	0.00396417	-0.1119	0.0118959	0.512978	2.19341e-06	-0.0800124	0.00792981	384	0.0360941	-0.00273483	0.000285807	0.0571367	0.0100765	0.377788	24.7797			M	-0.023	-0.0148019	0.00497138	0.512988
BHVO-2 (6)$		0.00484781	M013	2019-05-13	2.24666	8.03714e-06	-0.0292118	0.00316662	-0.0581652	0.00632711	-0.172176	0.0189867	0.512968	3.54005e-06	-0.124769	0.0126566	284	0.0461149	-0.00420809	0.000456173	0.194702	0.00855164	0.439426	23.0166	5.99868	0.260624	M	-0.023	-0.0351652	0.00700231	0.512978
BIR-1 (1)	Basalt, Iceland	0.0863	138	2017-02-24	3.24321	1.26825e-05	0.0114195	0.00245425	0.0227384	0.00490375	0.0673138	0.0147154	0.513078	2.70594e-06	0.0256942	0.00980932	381	0.0355713	0.00164499	0.000353537	0.04257	0.00850214	0.374236	2.26874			D1	0.0036	0.0191384	0.00529592	0.513088
BIR-1 (2)	Basalt, Iceland	0.05779	188	2018-04-01	1.92696	1.00061e-05	0.0184144	0.00286608	0.0366668	0.0057266	0.108548	0.0171847	0.513103	3.26935e-06	0.0545484	0.0114553	377	0.0358155	0.00265261	0.000412858	-0.0304014	0.00822192	0.375901	2.36728			D2	0.0191	0.0175668	0.00651183	0.513098
BIR-1 (3)	Basalt, Iceland	0.0794	M009	2018-12-13	3.94532	1.14698e-05	2.9883e-05	0.00207204	5.95027e-05	0.00414006	0.000176145	0.0124237	0.51308	2.43734e-06	-0.0171139	0.00828167	377	0.037798	4.30472e-06	0.000298483	-0.0134958	0.00959172	0.38911	2.34159			M	-0.023	0.0230595	0.00511274	0.51309
BIR-1 (4)	Basalt, Iceland	0.09138	M012	2019-05-09	2.32025	-3.79677e-07	-0.00857135	0.00404163	-0.0170671	0.00807543	-0.0505227	0.0242332	0.513069	4.90296e-06	-0.00767001	0.0161539	144	0.0373121	-0.00123473	0.000582212	-0.00542886	0.0118248	0.385919	2.34197			M	-0.023	0.00593291	0.00861467	0.513079
BIR-1 (4)*		0.09138	M013	2019-05-13	1.81566	-5.98521e-07	-0.00304055	0.00312326	-0.0060543	0.00624047	-0.0179224	0.0187267	0.513078	3.72454e-06	-0.0189687	0.0124833	343	0.0373122	-0.000438	0.000449915	0.141981	0.0067458	0.385919	2.34195			M	-0.023	0.0169457	0.00692412	0.513088
BIR-1 (5)	Basalt, Iceland	0.08394	M012	2019-05-10	2.91686	1.50072e-06	-0.00781359	0.00242501	-0.0155583	0.00484531	-0.0460563	0.0145401	0.513075	2.7991e-06	-0.0181699	0.00969243	382	0.0365848	-0.00112557	0.000349331	-0.0524517	0.00828097	0.381087	2.33785			M	-0.023	0.00744174	0.00569886	0.513085
BIR-1 (6)$	Basalt, Iceland	0.07669	M016	2019-05-29	2.2257	1.74618e-06	-0.00290457	0.0025718	-0.00578354	0.00513861	-0.0171209	0.0154202	0.513078	2.83147e-06	-0.0269217	0.0102791	393	0.0361218	-0.000418412	0.000370475	0.00229511	0.0050196	0.377975	2.3363	1.0851	0.464451	M	-0.023	0.0172165	0.00595023	0.513088
BIR-1 (7)$	Basalt, Iceland	0.08029	M012	2019-05-09	1.83874	1.71273e-05	-0.00906179	0.00330198	-0.0180436	0.00659755	-0.0534135	0.0197983	0.513081	4.14853e-06	-0.0632545	0.0131976	313	0.0365266	-0.00130538	0.000475662	0.179603	0.00687255	0.380698	2.32933	1.09111	0.468422	M	-0.023	0.00495636	0.00724759	0.513091
BIR-1 (8)$	Basalt, Iceland	0.07924	M012	2019-05-10	3.27358	-7.71813e-06	-0.0109379	0.00214383	-0.0217793	0.00428351	-0.0644718	0.0128542	0.513075	2.48028e-06	-0.0335104	0.00856861	374	0.0362525	-0.00157564	0.000308828	0.156502	0.0114271	0.378856	2.32477	1.08222	0.465517	M	-0.023	0.00122066	0.00522957	0.513085
G-2 (3)	Westerly Granite, Rhode Island	0.004635	M009	2018-12-13	3.00714	7.02211e-06	-0.024893	0.00219488	-0.049566	0.0043855	-0.146723	0.0131602	0.512216	2.61019e-06	-0.107502	0.00877262	374	0.0337513	-0.00358595	0.000316185	-0.033633	0.0073301	0.361585	54.2222			M	-0.023	-0.026566	0.00531343	0.512226
G-2 (4)	Westerly Granite, Rhode Island	0.0046	M010	2019-04-08	4.88153	-6.01723e-07	-0.0192882	0.00171079	-0.038406	0.00341826	-0.113689	0.0102577	0.512222	1.95978e-06	-0.0881644	0.00683779	377	0.0344447	-0.00277854	0.000246448	0.0575721	0.012911	0.36646	53.6186			M	-0.023	-0.015406	0.00454802	0.512232
G-2 (4)$		0.00490035	M012	2019-05-09	3.56773	6.72611e-06	-0.0244647	0.00289347	-0.0487131	0.00578132	-0.144198	0.0173489	0.512218	2.46775e-06	-0.101544	0.0115648	364	0.0351402	-0.00352424	0.000416821	0.0505274	0.0128042	0.371283	52.9479	7.18427	0.135686	M	-0.023	-0.0257131	0.00651335	0.512228
G-2 (4)$		0.00546577	M010	2019-04-11	4.69959	3.89042e-06	-0.0271234	0.00184995	-0.0540071	0.00369632	-0.159868	0.0110921	0.512215	2.02397e-06	-0.0969422	0.00739402	371	0.034503	-0.00390725	0.000266498	-0.0198993	0.00577895	0.366866	52.7327	7.17578	0.136078	M	-0.023	-0.0310071	0.00476054	0.512225
G-2 (5)	Westerly Granite, Rhode Island	0.0039	M010	2019-04-09	3.66915	1.42957e-05	-0.0267616	0.00218012	-0.0532867	0.00435602	-0.157736	0.0130718	0.512214	2.32391e-06	-0.104798	0.00871367	373	0.0334851	-0.00385513	0.000314061	0.0362568	0.00764779	0.359697	54.0893			M	-0.023	-0.0302867	0.00528913	0.512224
G-2 (5)#		0.00378	M010	2019-04-10	3.99591	-8.45158e-06	-0.0260003	0.00198179	-0.0517708	0.00395973	-0.153249	0.0118826	0.512216	2.28833e-06	-0.0965687	0.00792094	376	0.0335593	-0.00374546	0.000285489	0.0461583	0.0100943	0.360223	54.1004			M	-0.023	-0.0287708	0.00496784	0.512226
G-2 (6)	Westerly Granite, Rhode Island	0.00535	M010	2019-04-09	6.12383	1.87393e-05	-0.0305092	0.00176474	-0.0607486	0.00352605	-0.179823	0.0105812	0.512212	1.73861e-06	-0.109887	0.00705342	375	0.0334165	-0.00439499	0.000254223	0.0110641	0.00970711	0.359208	53.6402			M	-0.023	-0.0377486	0.00462958	0.512222
G-2 (6)#		0.0053	M010	2019-04-10	2.84191	-7.13787e-06	-0.0195221	0.0024012	-0.0388717	0.00479775	-0.115067	0.0143974	0.51222	2.7144e-06	-0.0875581	0.00959729	374	0.0294202	-0.00281223	0.000345906	0.100386	0.00872457	0.329532	53.729			M	-0.023	-0.0158717	0.00565848	0.51223
G-2 (6)$		0.0053091	M012	2019-05-09	3.17172	6.84034e-07	-0.0251098	0.00390941	-0.0499976	0.00781123	-0.148	0.0234404	0.512215	2.84475e-06	-0.104686	0.0156254	362	0.0320399	-0.00361717	0.000563174	0.117339	0.00874318	0.34926	54.0454	7.18583	0.132959	M	-0.023	-0.0269976	0.00836752	0.512225
G-2 (7)	Westerly Granite, Rhode Island	0.0044	M010	2019-04-10	3.65507	5.64569e-07	-0.027578	0.00204869	-0.0549123	0.00409341	-0.162547	0.0122837	0.512213	2.28725e-06	-0.101294	0.00818835	375	0.0335074	-0.00397274	0.000295127	0.0196043	0.00889024	0.359855	53.8592			M	-0.023	-0.0319123	0.00507504	0.512223
G-2 (7)#		0.00335858	M012	2019-05-09	4.01145	1.27535e-05	-0.0258978	0.00196197	-0.0515666	0.00392013	-0.152645	0.0117638	0.512217	2.39287e-06	-0.0977588	0.00784173	364	0.0393923	-0.00373069	0.000282634	0.13426	0.00439072	0.399372	53.6135	7.20865	0.134456	M	-0.023	-0.0285666	0.00493634	0.512227
G-2 (7)$		0.00439598	M012	2019-05-10	4.13012	4.74023e-06	-0.0275423	0.00197098	-0.0548412	0.00393814	-0.162337	0.0118178	0.512209	2.27339e-06	-0.108791	0.00787775	377	0.0323365	-0.0039676	0.000283933	0.00604107	0.0121713	0.351427	53.9074	7.21624	0.133864	M	-0.023	-0.0318412	0.00495065	0.512219
NIST Glass
NIST-612 (1)	Standard Reference Material	0.00704221	M017	2019-05-31	3.04926	-1.21343e-06	-0.0905135	0.00229114	-0.180221	0.00457784	-0.533413	0.0137374	0.511894	2.74399e-06	-0.337587	0.00915738	359	0.0336126	-0.0130393	0.000330074	0.0247544	0.00970898	0.360602	34.6928			M	-0.023	-0.157221	0.00547326	0.511904
NIST-612 (1)$		0.00703973	M016	2019-05-27	3.23917	1.03957e-05	-0.0924191	0.00332484	-0.184015	0.00664324	-0.54464	0.0199354	0.511899	4.72633e-06	-0.366085	0.013289	370	0.0334081	-0.0133138	0.000478996	0.135481	0.00896312	0.359152	34.6461	36.7966	1.06207	M	-0.023	-0.161015	0.00728922	0.511909
NIST-612 (1)$		0.00702189	M016	2019-05-27	3.75637	4.79163e-06	-0.0874419	0.00225859	-0.174106	0.00451279	-0.515315	0.0135422	0.511897	2.58783e-06	-0.34838	0.00902727	372	0.0337009	-0.0125968	0.000325383	-0.0579968	0.00643427	0.361229	34.762	36.8555	1.06022	M	-0.023	-0.151106	0.00541898	0.511907
NIST-612 (2)	Standard Reference Material	0.00712495	M017	2019-05-31	3.79628	-8.64656e-06	-0.085454	0.00210769	-0.170148	0.00421129	-0.503603	0.0126375	0.511894	2.2196e-06	-0.314349	0.00842415	372	0.0328317	-0.0123104	0.000303644	-0.110957	0.00521815	0.355015	34.974			M	-0.023	-0.147148	0.00517059	0.511904
NIST-612 (2)$		0.00713668	M017	2019-05-31	4.44184	7.3258e-07	-0.0846924	0.00181475	-0.168631	0.00362599	-0.499115	0.0108811	0.5119	2.08339e-06	-0.320845	0.00725332	378	0.0327822	-0.0122007	0.000261442	-0.0425446	0.00552308	0.354659	35.0861	37.2806	1.06255	M	-0.023	-0.145631	0.00470614	0.51191
NIST-612 (3)$	Standard Reference Material	0.00693423	M016	2019-05-27	2.75869	-4.9788e-06	-0.0807937	0.00241525	-0.160869	0.00482581	-0.476144	0.0144816	0.511901	2.79126e-06	-0.324067	0.00965342	378	0.0336428	-0.011639	0.00034795	0.0501936	0.00661033	0.360817	34.9376	37.1928	1.06455	M	-0.023	-0.137869	0.00568229	0.511911
NIST-612 (3)$		0.00694603	M017	2019-05-31	3.32574	-4.81722e-06	-0.0870741	0.00238015	-0.173373	0.00475568	-0.513148	0.0142711	0.511898	2.63223e-06	-0.334339	0.00951314	357	0.0337288	-0.0125438	0.000342896	0.00154863	0.00489088	0.361426	34.9967	37.1686	1.06206	M	-0.023	-0.150373	0.00562286	0.511908
NIST-612 (4)$	Standard Reference Material	0.00694401	M016	2019-05-29	3.20788	1.27922e-06	-0.0871073	0.00217116	-0.17344	0.00433812	-0.513344	0.0130181	0.511899	2.47628e-06	-0.342681	0.00867785	371	0.0336021	-0.0125486	0.000312789	0.160712	0.0109767	0.360528	34.8874	37.0391	1.06168	M	-0.023	-0.15044	0.0052744	0.511909
NIST-612 (4)$		0.00695837	M017	2019-05-31	4.54097	-2.05183e-07	-0.0853169	0.00177921	-0.169875	0.00355496	-0.502795	0.0106679	0.511897	1.99694e-06	-0.332835	0.00711125	375	0.0337347	-0.0122906	0.000256321	0.0844885	0.00861918	0.361468	34.8838	37.0291	1.0615	M	-0.023	-0.146875	0.00465164	0.511907
NIST-614 (1)$	Standard Reference Material	0.10942	M016	2019-05-27	1.91987	-3.37025e-06	-0.0860333	0.00304766	-0.171301	0.00608941	-0.507016	0.0182734	0.511898	3.48439e-06	-0.342752	0.0121811	371	0.0353541	-0.0123938	0.000439061	0.168625	0.00814013	0.372752	0.73486	0.759917	1.0341	M	-0.023	-0.148301	0.00678829	0.511908
NIST-614 (2)$	Standard Reference Material	0.17127	M016	2019-05-29	2.43197	9.55889e-06	-0.0835637	0.00282918	-0.166384	0.00565288	-0.492465	0.0169635	0.5119	3.17425e-06	-0.345482	0.0113079	390	0.0329731	-0.0120381	0.000407585	0.0598401	0.0103014	0.356034	0.751914	0.776433	1.03261	M	-0.023	-0.143384	0.00639961	0.51191
Lookout Volcanics
AMB-10	Marlborough, New Zealand	0.0101841	M016	2019-05-27	3.25606	3.01626e-06	-0.0231612	0.00216963	-0.0461177	0.00433505	-0.136516	0.0130089	0.512801	2.63769e-06	-0.0997622	0.00867172	370	0.0397039	-0.00333646	0.000312548	0.147579	0.00750231	0.401342	20.2234	4.41442	0.218283	M	-0.023	-0.0231177	0.00527188	0.512811
AMB-22	Marlborough, New Zealand	0.00910907	M016	2019-05-29	4.99445	7.87668e-06	-0.0238171	0.0019377	-0.0474236	0.00387164	-0.140381	0.0116182	0.512794	2.22328e-06	-0.100129	0.00774472	373	0.0421889	-0.00343095	0.000279137	0.105758	0.0102113	0.416641	21.2743	4.67976	0.219972	M	-0.023	-0.0244236	0.00489792	0.512804
AMB-41	Marlborough, New Zealand	0.00649871	M016	2019-05-27	3.65908	1.4368e-06	-0.021138	0.00222386	-0.0420893	0.00444341	-0.124591	0.013334	0.512778	2.5663e-06	-0.0921563	0.00888848	370	0.03728	-0.00304501	0.00032036	-0.0249452	0.00995861	0.385707	34.0482	7.08962	0.208223	M	-0.023	-0.0190893	0.00536133	0.512788
AMC-9	Marlborough, New Zealand	0.00765364	M016	2019-05-29	4.22219	1.4696e-05	-0.0208569	0.00180068	-0.0415296	0.00359787	-0.122935	0.0107967	0.512778	2.07205e-06	-0.104524	0.00719707	377	0.0357512	-0.00300453	0.000259398	-0.0446142	0.00649603	0.375462	29.9875	6.30285	0.210183	M	-0.023	-0.0185296	0.00468451	0.512788
AMG-8	Marlborough, New Zealand	0.00633562	M016	2019-05-27	4.36551	-4.08996e-06	-0.025233	0.00185647	-0.0502431	0.00370934	-0.148727	0.0111312	0.512794	2.32213e-06	-0.0930808	0.00742007	373	0.0429399	-0.00363493	0.000267436	0.0996197	0.00903607	0.421127	29.7187	6.45389	0.217166	M	-0.023	-0.0272431	0.00477066	0.512804
Footnotes:
() Numbers in parentheses represent a separate digestion.
# represents an independently spiked aliquot of the same digestion processed through the entire chemical procedure.
* represents a duplicate analysis of the same solution on a different filament.
$ denotes samples that also have the Sm tracer spike added

## Sheet: Table A3
Electronic Appendix Table 3: Recalculated Nd isotope data for chondritic meteorites and terrestrial materials from McCoy-West et al. (2017) EPSL
Sample	Classification	Locality	Mass (g)	Digestion	Barrel	Date		146Nd (V)	147Sm (V)	δ145Nd	95 % ci	δ146Nd	95 % ci	δ150Nd	95 % ci	143Nd/144Nd	95 % ci	δ148Nd	95 % ci	n	f 144Nd spike	β natural	95 % ci	β mass spec	95 % ci	spikeprop	Nd (ppm)	δ146NdCOR	95 % ci	143Nd/144NdCOR
Carbonaceous Chondrites
Orgueil	CI1	Fall (1864, France)	0.24064	HF	137	2017-02-19	D1	1.90318	7.72824e-06	-0.0139505	0.0030737	-0.0277779	0.00614143	-0.0822285	0.0184296	0.512597	3.3841e-06	-0.0612052	0.0122852	354	0.0312726	-0.00200962	0.00044278	0.151115	0.00842944	0.34359	0.496553	-0.0314336	0.00640231	0.512607
Murchison	CM2	Fall (1969, Australia)	0.183292	HF	137	2017-02-19	D1	3.01168	6.66691e-06	-0.0259861	0.00241175	-0.0517426	0.00481882	-0.153165	0.0144606	0.512527	2.73571e-06	-0.0872182	0.00963943	376	0.0379179	-0.00374341	0.000347427	0.157044	0.00851453	0.389892	0.716964	-0.0553983	0.00514717	0.512537
Cold Bokkeveld	CM2	Fall (1838, South Africa)	0.02637	HF	137	2017-02-21	D1	1.07983	7.88122e-06	-0.00722605	0.00549858	-0.0143884	0.0109865	-0.0425931	0.0329689	0.512633	6.16468e-06	-0.0302344	0.0219771	211	0.0471912	-0.00104093	0.00079209	0.174836	0.0178776	0.445396	0.390633	-0.0180441	0.0111344	0.512643
Maralinga~	CK4-an	Find (1974, Australia)	0.017236	HF	137	2017-02-19	D1	4.33015	8.78736e-06	0.0283246	0.00183714	0.0564003	0.00367072	0.16697	0.0110153	0.512013	2.17098e-06	0.0920704	0.0073428	374	0.0294735	0.00408016	0.000264637	0.0194708	0.0102517	0.329945	20.6159	0.0527446	0.00409226	0.512023
Karoonda	CK5	Fall (1930, Australia)	0.192513	CT	124	2016-12-08	D1	1.45499	2.35132e-06	-0.0126438	0.00470043	-0.025176	0.00939174	-0.0745264	0.0281833	0.512564	4.76961e-06	-0.0354308	0.018787	204	0.0349168	-0.00182138	0.000677117	-0.0943074	0.00660172	0.369739	0.921173	-0.0288317	0.00956437	0.512574
Karoonda#	CK5		0.233076	CT	134	2017-02-03	D1	1.98353	9.46082e-06	-0.00965299	0.00271913	-0.0192208	0.00543298	-0.0568981	0.0163036	0.512566	3.06561e-06	-0.0443696	0.010868	372	0.0407629	-0.00139054	0.000391701	0.150068	0.0106593	0.407948	0.888175	-0.0228765	0.00572623	0.512576
Ornans	CO3	Fall (1868, France)	0.213645	HF	137	2017-02-19	D1	2.2715	-2.86636e-08	-0.00944158	0.00283829	-0.0187999	0.00567107	-0.055652	0.0170181	0.512949	3.09084e-06	-0.0314375	0.0113443	374	0.0316937	-0.00136009	0.000408866	0.0354824	0.00601573	0.346713	0.758341	-0.0224556	0.0059526	0.512959
Kainsaz	CO3	Fall (1937, Russia)	0.216867	CT	124	2016-12-08	D1	2.2141	-6.98269e-07	-0.0143933	0.00405619	-0.0286596	0.00810452	-0.0848384	0.0243205	0.512627	4.89831e-06	-0.0318776	0.0162121	240	0.0381112	-0.00207341	0.000584313	-0.107365	0.0128128	0.391151	0.730513	-0.0323153	0.00830396	0.512637
Kainsaz#	CO3		0.293871	CT	134	2017-02-03	D1	2.12303	9.24358e-06	-0.016253	0.0027687	-0.0323625	0.00553204	-0.0957993	0.0166008	0.512627	3.33495e-06	-0.051962	0.0110661	375	0.0399534	-0.0023413	0.000398845	0.0314388	0.00987249	0.402909	0.73069	-0.0360182	0.0058203	0.512637
NWA1277	CO3	Find (2001)	0.270502	HF	137	2017-02-20	D1	3.61588	9.56892e-06	-0.00405623	0.00200103	-0.0080767	0.00399818	-0.0239092	0.011998	0.512599	2.26094e-06	-0.0255587	0.00799786	372	0.0305803	-0.000584312	0.000288255	0.0394974	0.00716375	0.338401	0.735608	-0.0117324	0.00438838	0.512609
Vigarano~	CV3	Fall (1910, Italy)	0.249143	HF	137	2017-02-20	D1	4.21963	1.52075e-06	0.015129	0.00193494	0.0301249	0.00386613	0.0891811	0.0116017	0.51251	2.26256e-06	0.0590271	0.00773371	370	0.0276299	0.00217935	0.000278729	0.10391	0.00591473	0.315414	0.898646	0.0264692	0.00426842	0.51252
Allende~	CV3	Fall (1969, Mexico)	0.2	CT	124	2016-12-08	D1	1.6746	-2.16927e-06	-0.0320879	0.00389391	-0.0638921	0.00778026	-0.189127	0.0233474	0.51253	4.31248e-06	-0.0839409	0.0155634	259	0.0364039	-0.00462242	0.000560945	-0.0523015	0.00862856	0.379871	0.8594	-0.0675478	0.0079878	0.51254
Allende#~	CV3		0.299788	CT	134	2017-02-03	D1	2.31557	1.58005e-05	-0.0228721	0.0025798	-0.0455422	0.00515459	-0.134812	0.0154682	0.512532	3.07381e-06	-0.101779	0.0103111	367	0.04173	-0.00329483	0.000371635	0.0210356	0.00855862	0.413868	0.815965	-0.0491979	0.0054628	0.512542
Allende(2)~	CV3		0.2	CT	125	2016-12-12	D1	2.02203	6.02841e-06	-0.030691	0.00402894	-0.0611106	0.00805006	-0.180894	0.0241571	0.512518	5.14747e-06	-0.0982617	0.0161031	249	0.036191	-0.00442119	0.000580396	0.148839	0.0135236	0.378441	0.829649	-0.0647663	0.00825081	0.512528
Allende(2)#~	CV3		0.258786	CT	134	2017-02-06	D1	2.97535	5.5901e-06	-0.025464	0.00270386	-0.0507028	0.00540248	-0.150088	0.0162121	0.512522	3.28545e-06	-0.0844355	0.010807	369	0.0391222	-0.00366819	0.000389508	-0.0296334	0.00928813	0.397656	0.837851	-0.0543586	0.0056973	0.512532
NWA2086~	CV3	Find (2005)	0.247292	HF	137	2017-02-20	D1	3.72251	8.38778e-06	-0.0436156	0.00215938	-0.0868448	0.00431457	-0.257064	0.0129474	0.512576	2.42884e-06	-0.203359	0.00863075	373	0.0293471	-0.00628307	0.000311078	0.0270449	0.00306871	0.328966	0.867474	-0.0905006	0.00467846	0.512586
																											Average-Carbonaceous:	-0.0287895	0.0162239	0.042213	9
																												Average	95% SE	2 SD	n
Enstatite Chondrites
Abee	EH4	Fall (1952, Canada)	0.264706	CT	124	2016-12-09	D1	2.08712	2.67253e-06	-0.0125703	0.00337085	-0.0250296	0.00673516	-0.074093	0.0202113	0.512624	3.79899e-06	-0.0308434	0.0134728	304	0.0349898	-0.00181079	0.000485586	-0.0136457	0.0097398	0.370243	0.417206	-0.0286853	0.00697387	0.512634
Abee#	EH4		0.411716	CT	134	2017-02-06	D1	1.46808	6.68736e-06	-0.0117608	0.00338053	-0.0234178	0.00675451	-0.0693219	0.0202693	0.51263	4.05053e-06	-0.0411768	0.0135115	377	0.0378649	-0.00169418	0.00048698	0.0268539	0.0105196	0.389547	0.432237	-0.0270735	0.00699256	0.51264
Indarch	EH4	Fall (1952, Azerbaijan)	0.2203	HF	137	2017-02-21	D1	2.59236	1.67009e-05	-0.0110203	0.00250488	-0.0219434	0.0050049	-0.0649574	0.015019	0.512566	2.76785e-06	-0.0711586	0.0100117	373	0.0325326	-0.00158751	0.000360838	0.106046	0.00483954	0.352852	0.39236	-0.0255991	0.00532178	0.512576
St Mark's	EH5	Fall (1903, South Africa)	0.07943	HF	137	2017-02-21	D1	1.22309	3.37894e-06	-0.00940911	0.00364284	-0.0187352	0.00727862	-0.0554607	0.0218421	0.512606	4.27028e-06	-0.0565016	0.01456	377	0.0356664	-0.00135541	0.000524766	0.0860206	0.00855773	0.374885	0.515742	-0.0223909	0.00750005	0.512616
Eagle	EL6	Fall (1946, USA)	0.353846	CT	124	2016-12-09	D1	2.33283	8.33481e-06	-0.00826578	0.00322801	-0.0164586	0.00644976	-0.0487216	0.0193548	0.512707	3.67102e-06	-0.0381062	0.0129019	300	0.0262055	-0.00119071	0.000465007	-0.0471387	0.00892105	0.303789	0.423765	-0.0201143	0.00669864	0.512717
Eagle#	EL6		0.405474	CT	134	2017-02-06	D1	1.61495	6.82824e-07	-0.0116467	0.0031203	-0.0231906	0.00623455	-0.0686493	0.018709	0.512714	3.51633e-06	-0.023657	0.0124714	374	0.0396423	-0.00167774	0.000449492	0.078188	0.0110269	0.400953	0.430447	-0.0268463	0.00649169	0.512724
Hvittis	EL6	Fall (1901, Finland)	0.33241	CT	124	2016-12-09	D1	3.56596	1.14902e-05	-0.00614796	0.00277773	-0.0122417	0.00555008	-0.0362386	0.016655	0.512724	2.88301e-06	-0.0206548	0.0111022	305	0.0337159	-0.000885632	0.000400142	-0.0103727	0.0130746	0.361335	0.357234	-0.0158974	0.00583744	0.512734
Hvittis#	EL6		0.480861	CT	134	2017-02-06	D1	2.80742	5.65559e-06	-0.00684348	0.00231427	-0.0136266	0.00462405	-0.0403381	0.0138761	0.512734	2.72924e-06	-0.0136707	0.00924981	376	0.0385388	-0.000985823	0.000333378	0.0829126	0.00733331	0.393917	0.362555	-0.0172823	0.0049653	0.512744
Khairpur	EL6	Fall (1873, Pakistan)	0.21561	HF	137	2017-02-21	D1	2.36138	7.95956e-06	-0.0192416	0.00259978	-0.0383133	0.00519453	-0.113414	0.015588	0.512601	3.26887e-06	-0.0784746	0.010391	377	0.0361689	-0.00277183	0.000374513	0.104007	0.00345745	0.378292	0.382166	-0.0419691	0.0055005	0.512611
Happy Canyon	EL6/7	Find (1971, USA)	0.211132	HF	137	2017-02-20	D1	3.77415	1.58897e-05	-0.0127316	0.00201138	-0.0253508	0.00401886	-0.0750439	0.01206	0.513329	2.5212e-06	-0.0706061	0.00803921	372	0.0349342	-0.00183403	0.000289748	0.0923355	0.00616426	0.36986	0.837484	-0.0290065	0.00440722	0.513339
																											Average-Enstatite:	-0.0254865	0.00531262	0.0148531	10
																												Average	95% SE	2 SD	n
Ordinary Chondrites
Trenzano	H3/4	Fall (1856, Italy)	0.3	CT	125	2016-12-10	D1	3.00519	4.20724e-06	-0.0214647	0.00266001	-0.0427397	0.00531486	-0.126517	0.0159491	0.512589	2.92115e-06	-0.0358506	0.0106317	300	0.0352572	-0.00309207	0.000383189	0.0118244	0.0103765	0.372086	0.571115	-0.0463954	0.00561428	0.512599
Trenzano#	H3/4		0.375952	CT	134	2017-02-03	D1	1.37606	1.75335e-05	-0.0194661	0.00351401	-0.0387602	0.0070212	-0.114737	0.0210696	0.512597	4.38711e-06	-0.0964422	0.014045	371	0.0375291	-0.00280417	0.000506211	0.0574262	0.00352941	0.387347	0.609594	-0.042416	0.00725049	0.512607
Zag	H3-6	Fall (1998, Western Sahara)	0.319288	HF	138	2017-02-22	D1	1.69594	2.09657e-05	-0.0170092	0.00378544	-0.0338683	0.00756353	-0.100257	0.0226971	0.512612	3.9767e-06	-0.0700204	0.0151299	294	0.0331239	-0.00245025	0.000545311	0.174823	0.00402186	0.357116	0.58021	-0.037524	0.00777685	0.512622
Allegan	H5	Fall (1899, USA)	0.315789	CT	125	2016-12-10	D1	5.74562	3.72563e-06	-0.0159187	0.00199816	-0.0316968	0.00399244	-0.0938287	0.0119807	0.512593	2.15829e-06	0.0431217	0.00798637	299	0.0355041	-0.00229314	0.000287844	-0.013908	0.0146988	0.373778	0.543966	-0.0353525	0.00438315	0.512603
Allegan#	H5		0.394722	CT	134	2017-02-03	D1	1.80929	2.29106e-06	-0.0180793	0.0036114	-0.0359989	0.0072158	-0.106563	0.0216536	0.512608	4.51886e-06	0.0307314	0.0144343	325	0.0384316	-0.00260439	0.000520241	0.141299	0.0106914	0.393225	0.559578	-0.0396546	0.0074391	0.512618
Garabato	H5	Find (1995, Argentina)	0.316235	HF	138	2017-02-22	D1	2.34223	1.05236e-05	-0.0122998	0.00283323	-0.0244911	0.00566097	-0.0724991	0.0169877	0.512569	2.86066e-06	-0.0365047	0.011324	376	0.0292511	-0.00177183	0.000408139	0.0662175	0.00718785	0.328221	0.658727	-0.0281468	0.00594298	0.512579
Jillin	H5	Fall (1976, Uruguay)	0.327273	CT	125	2016-12-10	D1	2.50998	-4.50693e-06	-0.0249785	0.00333723	-0.0497362	0.00666798	-0.147226	0.0200096	0.512585	3.44207e-06	-0.0539205	0.0133384	295	0.0355889	-0.00359825	0.000480748	-0.0527738	0.00987781	0.374356	0.533828	-0.0533919	0.00690901	0.512595
Jillin#	H5	Find (1995, Argentina)	0.402208	CT	134	2017-02-04	D1	2.26955	-7.33371e-06	-0.0122303	0.00259081	-0.0243526	0.00517659	-0.0720892	0.0155342	0.512596	2.90706e-06	-0.0245008	0.0103551	376	0.0369566	-0.00176181	0.000373217	0.0585007	0.00697146	0.383566	0.57997	-0.0280083	0.00548356	0.512606
Richardton	H5	Fall (1918, USA)	0.317182	HF	138	2017-02-22	D1	1.97894	1.18816e-05	-0.0200333	0.00304175	-0.0398897	0.0060776	-0.118081	0.018238	0.512581	3.28672e-06	-0.0915743	0.0121575	377	0.0270389	-0.00288588	0.00043818	0.108857	0.00979807	0.310634	0.613017	-0.0435454	0.0063411	0.512591
Estacado	H6	Find (1883, USA)	0.3	CT	125	2016-12-10	D1	3.92661	-4.35865e-07	-0.0130904	0.00296463	-0.0260653	0.00592351	-0.0771589	0.0177756	0.515338	2.69243e-06	-0.0313067	0.0118492	293	0.0174659	-0.00188572	0.000427068	0.113214	0.00923312	0.223745	1.14515	-0.029721	0.00619358	0.515348
Estacado#	H6		0.22515	HF	134	2017-02-04	D1	1.66927	-6.35894e-06	0.00216386	0.00307953	0.00430865	0.00615308	0.0127549	0.0184645	0.515352	3.66375e-06	0.0258359	0.0123085	372	0.036465	0.000311709	0.000443612	0.0884299	0.00644199	0.380284	1.2447	0.000652948	0.00641349	0.515362
Homestead	L5	Fall (1875, USA)	0.265487	CT	125	2016-12-11	D1	1.17831	3.26142e-05	-0.00768448	0.00405191	-0.0153012	0.00809597	-0.0452953	0.0242948	0.512579	5.03981e-06	-0.122609	0.016195	283	0.0367273	-0.00110697	0.000583693	0.109466	0.00794566	0.382037	0.62316	-0.0189569	0.00829561	0.512589
Homestead#	L5		0.344537	CT	134	2017-02-04	D1	2.2175	-9.14777e-06	-0.00530269	0.00259217	-0.0105586	0.00517931	-0.0312562	0.0155424	0.512577	3.23814e-06	-0.0223913	0.0103605	371	0.0385552	-0.000763867	0.00037341	0.108228	0.00676565	0.394022	0.64454	-0.0142143	0.00548613	0.512587
Fisher	L6	Fall (1894, USA)	0.301331	HF	138	2017-02-23	D1	1.59225	6.54503e-06	-0.00191436	0.00320778	-0.00381184	0.00640934	-0.0112841	0.0192335	0.512612	3.63546e-06	-0.046428	0.0128211	364	0.0312793	-0.000275768	0.00046209	0.0198387	0.00615714	0.343642	0.653071	-0.00746755	0.00665974	0.512622
L'Aigle	L6	Fall (1803, France)	0.329931	HF	138	2017-02-23	D1	3.40321	1.36137e-06	0.00342793	0.00221678	0.00682566	0.00442925	0.0202061	0.0132915	0.512611	2.30477e-06	-0.0210641	0.00886015	378	0.0283609	0.000493801	0.000319331	-0.0153953	0.010319	0.321245	0.590782	0.00316995	0.00478442	0.512621
Long Island	L6	Find (1891, USA)	0.302454	HF	138	2017-02-22	D1	1.69341	2.54999e-06	-0.00990578	0.00358198	-0.0197242	0.00715701	-0.0583881	0.0214771	0.512592	3.74901e-06	-0.0285743	0.0143167	322	0.0286468	-0.00142696	0.000515998	0.164377	0.00491213	0.323499	0.596245	-0.0233799	0.00738208	0.512602
Mauerkirchen	L6	Fall (2006, Austria)	0.3	CT	125	2016-12-11	D1	2.91123	2.17923e-05	0.000652702	0.00273571	0.00129965	0.00546612	0.00384735	0.016403	0.512538	2.92191e-06	-0.0492778	0.0109343	300	0.0288582	9.40233e-05	0.000394086	0.000442147	0.00704238	0.325159	0.71798	-0.00235605	0.00575768	0.512548
Mauerkirchen#	L6		0.299121	CT	134	2017-02-04	D1	2.36176	-1.30573e-05	-0.00512835	0.00255808	-0.0102115	0.0051112	-0.0302287	0.015338	0.512529	3.07413e-06	0.0116878	0.0102243	369	0.039241	-0.000738754	0.000368499	0.13754	0.0069468	0.398411	0.723844	-0.0138672	0.00542187	0.512539
Waconda~	L6	Find (1873, USA)	0.31465	HF	138	2017-02-23	D1	2.01975	1.06084e-05	-0.0328285	0.00291076	-0.0653666	0.00581587	-0.193492	0.0174526	0.512574	3.55115e-06	-0.184109	0.0116339	371	0.0297595	-0.00472911	0.000419315	0.0734869	0.00865559	0.332149	0.583122	-0.0690223	0.00609071	0.512584
Dhurmsala	LL6	Fall (1860, India)	0.3	CT	125	2016-12-11	D1	7.07034	3.19842e-05	-0.0118562	0.00267819	-0.0236077	0.00535119	-0.0698842	0.0160581	0.512644	3.21721e-06	-0.0490994	0.0107044	124	0.0402134	-0.00170792	0.000385805	0.213664	0.0035258	0.404536	0.490771	-0.0272634	0.00564868	0.512654
Dhurmsala#	LL6		0.437414	CT	134	2017-02-06	D1	2.09067	3.40519e-06	-0.0111338	0.00349027	-0.0221693	0.00697378	-0.065626	0.0209273	0.512651	3.80455e-06	-0.0154681	0.0139502	305	0.0361856	-0.00160385	0.000502788	0.111089	0.0125079	0.378405	0.543205	-0.025825	0.00720458	0.512661
Holbrook	LL6	Fall (1912, USA)	0.280652	HF	138	2017-02-23	D1	3.44175	1.31352e-05	-0.013811	0.00469527	-0.0275001	0.00938144	-0.081406	0.0281524	0.512542	2.38791e-06	-0.0648296	0.0187664	378	0.0333156	-0.00198952	0.000676375	0.0177573	0.010104	0.358488	0.652958	-0.0311558	0.00955426	0.512552
																											Average-Ordinary:	-0.0259438	0.00720251	0.0316458	21
																											CHONDRITE-AVERAGE:	-0.0268476	0.00408687	0.0255577	40
																												Average	95% SE	2SD	n
Rock Standards
AGV-1	Andesite	Lake Caunty, Oregon	0.016925	HF	120	2016-11-26	D1	3.75488	1.0235e-05	-0.0166625	0.0023602	-0.0331778	0.00471582	-0.0982129	0.0141515	0.512779	2.81262e-06	-0.0383196	0.0094334	299	0.0415564	-0.00240029	0.000339998	0.168981	0.00596595	0.412814	31.9962	-0.0368335	0.00505088	0.512789
AGV-1*					135	2017-02-09	D1	2.96279	-3.83598e-06	-0.0128207	0.00240719	-0.0255282	0.00480971	-0.0755689	0.0144332	0.512775	2.6301e-06	-0.0287372	0.0096212	368	0.0415558	-0.00184686	0.000346766	0.140658	0.0049792	0.412809	31.9966	-0.0291839	0.00513864	0.512785
AGV-1(2)	Andesite	Lake Caunty, Oregon	0.016925	HF	133	2017-01-29	D1	4.44389	3.3706e-05	-0.0140024	0.00213185	-0.0278813	0.00425958	-0.0825344	0.0127824	0.512777	2.25178e-06	-0.0356891	0.00852074	374	0.0363255	-0.0020171	0.000307103	0.112923	0.00799556	0.379347	32.1368	-0.031537	0.00462778	0.512787
BCR-1	Basalt	Columbia River, Washington	0.02011	HF	133	2017-01-29	D1	5.01745	1.51013e-05	-0.00818195	0.00177722	-0.0162917	0.00355098	-0.0482275	0.010656	0.512625	1.93093e-06	-0.0291031	0.00710329	369	0.0357161	-0.00117864	0.000256014	0.0810242	0.00786287	0.375223	28.8182	-0.0199474	0.00398521	0.512635
BCR-1(2)	Basalt	Columbia River, Washington	0.019527	HF	120	2016-11-26	D1	4.01859	1.59142e-05	-0.0157753	0.00232964	-0.0314113	0.00465475	-0.0929836	0.0139682	0.512624	2.59129e-06	-0.0446095	0.00931124	307	0.0369628	-0.00227249	0.000335595	0.0806305	0.00986537	0.383602	28.5498	-0.035067	0.00499391	0.512634
BCR-1(2)*					135	2017-02-09	D1	2.86451	6.3289e-06	-0.0218044	0.00231475	-0.0434162	0.00462502	-0.128519	0.013879	0.512619	2.71655e-06	-0.0552993	0.00925175	371	0.0369621	-0.00314102	0.000333453	0.0921051	0.00638049	0.383607	28.5506	-0.047072	0.0049662	0.512629
BCR-1(3)	Basalt	Columbia River, Washington	0.016516	HF	120	2016-11-28	D1	5.28988	1.47859e-05	-0.00975296	0.00176755	-0.0194199	0.00353168	-0.0574873	0.0105981	0.512623	2.17553e-06	-0.0433465	0.00706468	299	0.0374296	-0.00140494	0.000254623	0.121807	0.00967908	0.386694	28.7097	-0.0230756	0.00396802	0.512633
BCR-1(3)*					135	2017-02-12	D1	3.29906	-4.37177e-06	-0.0131848	0.00219254	-0.0262531	0.00438082	-0.077715	0.0131462	0.512622	2.42494e-06	-0.0209865	0.00876327	377	0.0374297	-0.00189931	0.000315844	0.0502715	0.00826963	0.386692	28.7097	-0.0299089	0.00473962	0.512632	-0.0310142
BCR-2	Basalt	Columbia River, Washington	0.02035	HF	120	2016-11-28	D1	4.42771	1.16902e-05	-0.00508977	0.00217324	-0.0101347	0.00434226	-0.0300013	0.0130305	0.512622	2.51188e-06	-0.0223942	0.00868614	300	0.035058	-0.000733197	0.000313062	-0.0349654	0.00751363	0.370714	28.2924	-0.0137904	0.004704	0.512632
BCR-2*					133	2017-01-29	D1	3.99358	5.84312e-06	-0.0142308	0.00198579	-0.0283359	0.00396774	-0.0838802	0.0119066	0.512626	2.25395e-06	-0.0330522	0.00793695	372	0.0350576	-0.00204999	0.000286063	0.0444537	0.00246549	0.370712	28.2928	-0.0319916	0.00436066	0.512636	-0.022891
BE-N	Basalt	Essey-la-Cote, France	0.015495	HF	120	2016-11-26	D1	3.68048	8.0855e-07	-0.0207102	0.00235966	-0.0412375	0.00471475	-0.12207	0.0141483	0.512864	2.85815e-06	-0.0633485	0.00943126	301	0.0358097	-0.00298339	0.000339922	0.0495078	0.0121948	0.375862	66.739	-0.0448932	0.00504988	0.512874
BE-N*					135	2017-02-09	D1	2.70271	4.02077e-06	-0.0227842	0.00238934	-0.045367	0.00477404	-0.134293	0.0143262	0.512867	2.70859e-06	-0.0584568	0.00954985	378	0.0358097	-0.00328215	0.000344198	0.126081	0.00460521	0.37586	66.7391	-0.0490227	0.00510528	0.512877
BE-N(2)	Basalt	Essey-la-Cote, France	0.015495	HF	120	2016-11-28	D1	2.4475	8.96331e-06	-0.0101288	0.00421004	-0.0201683	0.00841192	-0.0597028	0.025243	0.512863	4.5035e-06	-0.0441927	0.016827	153	0.0354383	-0.00145909	0.000606473	-0.145946	0.00899168	0.373325	66.1937	-0.023824	0.00860423	0.512873
BE-N(2)*					133	2017-01-30	D1	3.05558	-1.68254e-06	-0.0101621	0.00240109	-0.0202345	0.00479753	-0.0598987	0.0143967	0.512865	2.64685e-06	-0.0417385	0.00959685	373	0.0354377	-0.00146388	0.000345887	0.0260758	0.0128421	0.373323	66.1948	-0.0238902	0.00512725	0.512875
BE-N(2)*					135	2017-02-13	D1	2.17781	-1.28596e-06	-0.0193524	0.00270264	-0.0385339	0.00540005	-0.114067	0.0162048	0.512864	3.10121e-06	-0.0321342	0.0108021	375	0.0354371	-0.00278779	0.00038933	0.10682	0.00536176	0.373318	66.1963	-0.0421896	0.00569499	0.512874	-0.0367639
BHVO-1	Basalt	Kilauea volcano, Hawaii	0.01889	HF	120	2016-11-28	D1	1.61954	9.78147e-06	-0.0113636	0.00353449	-0.0226269	0.00706213	-0.0669808	0.0211924	0.512963	4.10194e-06	-0.0653407	0.0141269	299	0.0359878	-0.00163697	0.000509158	-0.0809619	0.00767358	0.377065	24.5622	-0.0262826	0.00729014	0.512973
BHVO-1*					133	2017-01-30	D1	3.81937	2.53371e-06	-0.0155419	0.00203381	-0.0309466	0.00406368	-0.0916081	0.0121945	0.512969	2.38504e-06	-0.0546022	0.00812888	370	0.0359876	-0.00223887	0.00029298	0.121726	0.008685	0.377066	24.5624	-0.0346023	0.00444814	0.512979
BHVO-1(2)	Basalt	Kilauea volcano, Hawaii	0.02239	HF	120	2016-11-26	D1	3.97335	3.49799e-05	-0.0133319	0.00213606	-0.0265461	0.00426798	-0.0785822	0.0128076	0.512974	2.6661e-06	-0.0474345	0.00853754	300	0.0385753	-0.00192051	0.000307709	0.0108306	0.0102279	0.394147	24.7009	-0.0302018	0.00463552	0.512984
BHVO-1(2)*					135	2017-02-09	D1	3.11924	1.35024e-05	-0.0193265	0.00234237	-0.0384824	0.0046802	-0.113915	0.0140446	0.512971	2.5647e-06	-0.0639519	0.00936215	375	0.0385745	-0.00278406	0.000337431	0.138184	0.00657143	0.394153	24.7015	-0.0421381	0.00501764	0.512981
BHVO-1(3)	Basalt	Kilauea volcano, Hawaii	0.018951	HF	120	2016-11-28	D1	3.37238	7.4864e-06	-0.0107137	0.00238748	-0.0213328	0.00477033	-0.06315	0.0143151	0.512969	2.93631e-06	-0.0507987	0.00954244	301	0.0376103	-0.00154334	0.000343926	0.0484691	0.00792493	0.387846	24.87	-0.0249885	0.00510181	0.512979
BHVO-1(3)*					135	2017-02-13	D1	3.70686	3.26172e-06	-0.0122374	0.00202962	-0.0243667	0.0040553	-0.0721309	0.0121694	0.512976	2.25981e-06	-0.0418338	0.0081121	373	0.037605	-0.00176283	0.000292375	0.0772556	0.0050278	0.387879	24.8736	-0.0280225	0.00444048	0.512986
BHVO-1(3)*					135	2017-02-13	D1	3.16225	-3.02345e-06	-0.0206855	0.00234506	-0.0411883	0.00468558	-0.121924	0.0140608	0.51297	2.761e-06	-0.0451515	0.00937291	346	0.0375727	-0.00297983	0.000337819	0.20014	0.00159368	0.387879	24.896	-0.044844	0.00502266	0.51298
BHVO-1(4)	Basalt	Kilauea volcano, Hawaii	0.020445	HF	121	2016-11-30	D1	2.63592	1.3354e-05	-0.0107784	0.00618146	-0.0214618	0.0123509	-0.0635317	0.0370633	0.512978	3.52764e-06	-0.0567543	0.0247065	298	0.0379847	-0.00155267	0.000890464	0.0729196	0.00750777	0.390326	24.8766	-0.0251175	0.0124827	0.512988
BHVO-1(4)*					135	2017-02-09	D1	3.82698	4.12503e-06	-0.016213	0.00209903	-0.0322829	0.00419399	-0.0955638	0.0125855	0.512974	2.26313e-06	-0.051832	0.00838954	375	0.0379844	-0.00233555	0.000302375	0.111831	0.00583984	0.39033	24.8769	-0.0359386	0.00456749	0.512984
BHVO-1(5)	Basalt	Kilauea volcano, Hawaii	0.016173	HF	122	2016-12-04	D1	4.62915	9.1343e-06	-0.0126538	0.00238344	-0.025196	0.00476226	-0.0745856	0.0142909	0.512974	2.57447e-06	-0.0376202	0.0095263	386	0.0375921	-0.00182283	0.000343345	0.0197577	0.00956396	0.387755	24.8406	-0.0288517	0.00509427	0.512984
BHVO-1(5)*					135	2017-02-13	D1	3.66364	-2.57694e-07	-0.012577	0.00209066	-0.025043	0.00417727	-0.0741328	0.0125354	0.512978	2.57657e-06	-0.032101	0.0083561	376	0.0375912	-0.00181176	0.000301169	0.100914	0.00538846	0.387761	24.8412	-0.0286987	0.00455214	0.512988	-0.0317897
DNC-1	Dolerite	Braggstown, North Carolina	0.05003	HF	120	2016-11-28	D1	4.05454	1.00337e-05	-0.0109066	0.00321683	-0.021717	0.00642742	-0.0642872	0.0192878	0.512446	3.76383e-06	-0.0433882	0.0128572	224	0.0369602	-0.00157113	0.000463397	0.00656292	0.0140051	0.383588	4.85534	-0.0253727	0.00667713	0.512456
DR-N	Diorite	Massif du Champ du Feu, France	0.02079	HF	120	2016-11-28	D1	2.74272	7.17323e-06	-0.0132795	0.00228544	-0.0264419	0.00456646	-0.0782736	0.0137033	0.512431	2.86956e-06	-0.0714955	0.00913461	301	0.0360437	-0.00191296	0.000329228	0.100513	0.0103	0.377582	23.0704	-0.0300976	0.00491171	0.512441
DR-N*					135	2017-02-12	D1	3.19681	5.94234e-06	-0.0168019	0.00210767	-0.0334554	0.00421126	-0.0990346	0.0126374	0.512436	2.45901e-06	-0.0554665	0.00842408	368	0.0360632	-0.00242038	0.00030362	0.0975188	0.00697936	0.377445	23.0576	-0.0371112	0.00458335	0.512446
G-2	Granite	Westerly Granite, Rhode Island	0.01039	HF	120	2016-11-26	D1	6.55873	1.59878e-05	-0.0140735	0.00164113	-0.0280228	0.00327907	-0.0829534	0.00984003	0.512211	1.93662e-06	-0.00303431	0.00655937	300	0.0368122	-0.00202734	0.000236412	0.0293232	0.00571749	0.382605	53.5339	-0.0316785	0.00374496	0.512221
G-2*					135	2017-02-09	D1	3.70733	6.51671e-06	-0.0189374	0.00196472	-0.0377076	0.00392564	-0.111621	0.0117803	0.512218	2.35663e-06	-0.0592892	0.00785274	371	0.0368112	-0.00272801	0.000283029	0.112352	0.00658239	0.382598	53.5356	-0.0413633	0.00432239	0.512228
G-2(2)	Granite	Westerly Granite, Rhode Island	0.01039	HF	121	2016-12-01	D1	2.86765	-1.7178e-06	-0.0112051	0.00236187	-0.0223114	0.00471915	-0.0660467	0.0141615	0.512216	2.73328e-06	-0.0313918	0.00944006	373	0.0365142	-0.00161414	0.000340236	0.0614479	0.00618304	0.380613	53.8887	-0.0259671	0.00505399	0.512226
G-2(2)*					135	2017-02-13	D1	3.43013	2.1582e-06	-0.0129881	0.00207107	-0.0258616	0.00413813	-0.0765559	0.0124179	0.512217	2.31218e-06	-0.0364929	0.00827779	372	0.0365133	-0.00187098	0.000298347	0.0731181	0.00587932	0.380607	53.8902	-0.0295173	0.00451625	0.512227
JG-2	Granite	Naegi granite, Japan	0.02328	HF	120	2016-11-28	D1	5.17945	1.66553e-05	0.00758398	0.00187177	0.0151012	0.00373991	0.0447045	0.0112229	0.512218	2.24718e-06	0.0279605	0.00748121	303	0.0397067	0.00109249	0.000269631	0.0218927	0.0105258	0.401358	26.3389	0.0114455	0.00415443	0.512228
JG-2*					135	2017-02-12	D1	2.76817	2.44804e-06	0.00632889	0.00243956	0.0126021	0.0048744	0.0373062	0.0146274	0.51222	2.94332e-06	0.0439656	0.00975061	376	0.0397039	0.00091169	0.000351423	0.0627767	0.00471952	0.401341	26.3409	0.00894634	0.00519925	0.51223
RGM-1	Rhyolite	Glass Mountain, California	0.02158	HF	121	2016-12-01	D1	3.9738	8.67353e-06	-0.00466211	0.00225975	-0.0092831	0.00451512	-0.0274804	0.0135492	0.512784	2.51155e-06	-0.0099219	0.00903193	298	0.0357885	-0.00067159	0.000325525	0.126591	0.00649884	0.375716	19.0733	-0.0129388	0.00486403	0.512794
RGM-1*					135	2017-02-12	D1	3.70125	4.08929e-06	-0.00214447	0.00430449	-0.00427003	0.00860064	-0.0126405	0.0258093	0.512787	2.39756e-06	0.000887178	0.0172045	375	0.0357884	-0.000308916	0.000620074	0.0765734	0.00551047	0.375716	19.0733	-0.00792574	0.00878882	0.512797
TLM-1	Tonalite	Perris, California	0.02159	HF	121	2016-12-01	D1	4.05024	4.28819e-06	-0.0140309	0.00199805	-0.027938	0.00399223	-0.0827024	0.0119801	0.512616	2.57654e-06	-0.0454269	0.00798595	375	0.0376646	-0.00202121	0.000287828	0.0569814	0.0118783	0.388237	16.8889	-0.0315937	0.00438296	0.512626
TLM-1*					135	2017-02-12	D1	2.87346	3.06548e-06	-0.0143559	0.00223815	-0.0285851	0.00447197	-0.0846179	0.0134197	0.512615	2.77637e-06	-0.036952	0.0089456	374	0.0376648	-0.00206802	0.000322416	0.0575991	0.00720575	0.388239	16.8888	-0.0322408	0.00482399	0.512625
MORBs
GN4-1	Glass	Eastern Trough, Garret Fracture Zone	0.0373134	HF	121	2016-12-01	D1	3.82851	-1.35348e-06	-0.00934274	0.00233736	-0.0186031	0.00467018	-0.0550694	0.0140145	0.513262	2.62426e-06	-0.0210493	0.00934211	293	0.0446415	-0.00134585	0.000336705	0.122753	0.00905807	0.431064	3.49366	-0.0222588	0.0050083	0.513272
GN4-11	Glass	Eastern Trough, Garret Fracture Zone	0.0487805	HF	121	2016-12-01	D1	4.93071	3.37024e-06	-0.0146141	0.0021657	-0.0290991	0.00432719	-0.0861394	0.0129853	0.513253	2.33486e-06	-0.0545312	0.00865599	298	0.0331051	-0.00210521	0.000311978	0.123387	0.010975	0.356982	4.10078	-0.0327548	0.00469009	0.513263
GN13-1	Glass	Eastern Trough, Garret Fracture Zone	0.0371058	HF	121	2016-11-30	D1	3.07685	1.32851e-05	-0.00279413	0.00252526	-0.00556364	0.00504563	-0.0164699	0.0151412	0.51329	2.85488e-06	0.462037	0.0100931	296	0.0413884	-0.000402503	0.000363771	0.138631	0.00977937	0.411789	4.46811	-0.00921934	0.00536011	0.5133
GN13-8	Glass	Eastern Trough, Garret Fracture Zone	0.0163934	HF	121	2016-11-30	D1	2.94856	1.75563e-05	-0.00957311	0.00242771	-0.0190618	0.00485071	-0.0564273	0.0145563	0.513208	3.03907e-06	-0.0437901	0.00970323	299	0.0445038	-0.00137904	0.000349721	0.125875	0.00450804	0.430271	9.21288	-0.0227175	0.00517704	0.513218
Mantle
GN14-1	Harzburgite	Eastern Trough, Garret Fracture Zone	1.07147	CT	140	2017-03-01	D1	2.08526	6.21109e-06	-0.00482517	0.00520994	-0.00960779	0.0104098	-0.0284416	0.0312383	0.513274	3.34847e-06	-0.0143187	0.0208234	374	0.00662796	-0.000695079	0.000750509	-0.0395459	0.0102151	0.0976254	0.633216	-0.0132635	0.0105658	0.513284
GN14-2	Harzburgite	Eastern Trough, Garret Fracture Zone	1.06871	CT	140	2017-03-01	D1	2.36616	3.82791e-06	-0.00530448	0.00248269	-0.0105622	0.00496057	-0.0312668	0.0148859	0.51325	3.00592e-06	0.00616018	0.00992298	361	0.0434628	-0.000764125	0.00035764	0.0592736	0.00812147	0.424214	0.138877	-0.0142179	0.00528012	0.51326
GN14-9	Harzburgite	Eastern Trough, Garret Fracture Zone	1.11431	CT	140	2017-03-01	D1	1.44997	1.32529e-05	0.00446644	0.0069786	0.00889354	0.0139437	0.0263277	0.0418429	0.513217	4.63165e-06	0.0355755	0.0278925	384	0.0407331	0.000643401	0.00100528	-0.0452932	0.0122203	0.407767	0.0981205	0.00523784	0.0140605	0.513227
GN15-5	Harzburgite	Eastern Trough, Garret Fracture Zone	0.6701	CT	140	2017-03-01	D1	2.89062	2.60412e-05	-0.0190141	0.00527355	-0.0378602	0.0105369	-0.112073	0.0316197	0.513275	3.14671e-06	-0.054522	0.0210777	376	0.06952	-0.00273905	0.000759683	0.0998127	0.0106346	0.547813	0.223727	-0.0415159	0.010691	0.513285
KH-1	Lherzolite	Kilbourne Hole, New Mexico	0.53508	CT	140	2017-03-02	D1	1.94864	3.77752e-06	0.0161374	0.00322478	0.0321328	0.00644331	0.0951253	0.0193354	0.513241	3.66374e-06	0.0166538	0.012889	329	0.0301553	0.00232461	0.00046453	0.156841	0.0108345	0.335178	0.504677	0.028477	0.00669243	0.513251
KH-8312	Lherzolite	Kilbourne Hole, New Mexico	0.52591	CT	140	2017-03-02	D1	3.85469	7.32966e-06	-0.00718944	0.00221383	-0.0143155	0.00442338	-0.0423774	0.0132739	0.51299	2.30539e-06	-0.0223151	0.0088484	383	0.0235069	-0.00103566	0.000318911	-0.0978701	0.00706524	0.280747	0.806601	-0.0179712	0.00477898	0.513
MUH-1	Harzburgite	Spike Complex, Austria	0.99221	CT	140	2017-03-02	D1	2.04438	5.84328e-06	0.0112941	0.00299006	0.0224888	0.00597432	0.0665747	0.0179281	0.512963	3.23927e-06	0.00449323	0.0119509	371	0.0361154	0.00162693	0.00043072	0.07463	0.00723571	0.377931	0.167716	0.018833	0.00624218	0.512973
UB-N	Serpentinite	Col de Bagenelles, France	0.19931	HF	121	2016-12-01	D1	2.54145	8.22283e-06	-0.0209655	0.00494188	-0.0417458	0.00987417	-0.123575	0.029631	0.512918	3.02198e-06	-0.0255229	0.019752	373	0.0566487	-0.00302016	0.000711905	0.161944	0.0101091	0.493337	0.418527	-0.0454015	0.0100385	0.512928
																											Average-Mantle:	-0.00997775	0.0220795	0.0528205	8
Footnotes:																												Average	95% SE	2 SD	n
() Numbers in parentheses represent a separate digestion.
# represents an independently spiked aliquot of the same digestion processed through the entire chemical procedure.
* represents a duplicate analysis of the same solution on a different filament.
~ denotes samples that are exclude from average calculations.

## Sheet: Table A4
Electronic Appendix Table 4: Average and published values for USGS rock standards
Reference	Sm (ppm)	Nd (ppm)	Sm/Nd	143Nd/144NdCOR
BHVO-2
[65] Weis et al. (2006) G3				0.512984
[11] McCoy-West et al. (2010) JPet				0.512982
[66] Li et al. (2015) JAAS				0.512986
[67] Pin et al. (2017) AChem				0.512983
[72] Li et al. (2012) AChem	6.07	24.63	0.246447
[63] Jochum et al. (2016) GGR*	6.023 ±0.009	24.27 ±0.25	0.248 ±0.004	0.512979
Average	6.023 ±0.009	24.27 ±0.25	0.248 ±0.004	0.512983 ±5
BIR-1
[66] Li et al. (2015) JAAS				0.513099
[67] Pin et al. (2017) AChem				0.513107
[53] Pin & Zalduegui (1997) ACA	1.1	2.38	0.462185	0.513087
[72] Li et al. (2012) AChem	1.12	2.426	0.461665
[63] Jochum et al. (2016) GGR*	1.113 ±0.016	2.397 ±0.043	0.464 ±0.011	0.513091
Average	1.113 ±0.016	2.397 ±0.043	0.464 ±0.011	0.513096 ±18
G-2
[65] Weis et al. (2006) G3				0.512226
[53] Pin & Zalduegui (1997) ACA	7.135	53.45	0.133489	0.512217
[63] Jochum et al. (2016) GGR*	7.19 ±0.10	53.81 ±0.67	0.133 ±0.003	0.512233
Average	7.19 ±0.10	53.81 ±0.67	0.133 ±0.003	0.512225 ±16
*Concentration values represent the recommended values from this study which are the average of at least five independent isotope dilution measurements and therefore have been adopted for the concentration values herein
All 143Nd/144Nd have been corrected to 143Nd/144Nd in JNdi-1 = 0.512112
